# Supplementary material for: Emergence of the East-Central-South-African genotype of Chikungunya virus in Brazil and the city of Rio de Janeiro may have occurred years before surveillance detection
Source: PubMed Central journal article supplement (PMC6391440; doi:10.1038/s41598-019-39406-9), 2019-02-26
Supplement: 41598_2019_39406_MOESM1_ESM.pdf [file 41598_2019_39406_MOESM1_ESM.pdf]

## SUPPLEMENTARY INFORMATION

### **Emergence of the East-Central-South-African genotype of Chikungunya virus in Brazil and the city of Rio de Janeiro may have occurred years before surveillance detection**

Thiago Moreno L. Souza<sup>1,5,11,\*,#</sup>, Yasmine Rangel Vieira<sup>1,#</sup>, Edson Delatorre<sup>3,#</sup>, Giselle Barbosa-Lima<sup>1</sup>, Raul Leal Faria Luiz<sup>1</sup>, Alexandre Vizzoni<sup>1</sup>, Komal Jain<sup>2</sup>, Milene Mesquita<sup>4</sup>, Nishit Bhuv<sup>2</sup>, Jan F. Gogarten<sup>2</sup>, James Ng<sup>2</sup>, Riddhi Thakkar<sup>2</sup>, Andrea Surrage Calheiros<sup>5</sup>, Ana Paula Teixeira Monteiro<sup>5</sup>, Patrícia T. Bozza<sup>5</sup>, Fernando A. Bozza<sup>1,6</sup>, Diogo A. Tschoeke<sup>7</sup>, Luciana Leomil<sup>7</sup>, Marcos Cesar Lima de Mendonça<sup>8</sup>, Cintia Damasceno dos Santos Rodrigues<sup>8</sup>, Maria C. Torres<sup>8</sup>, Ana Maria Bispo de Filippis<sup>8</sup>, Rita Maria Ribeiro Nogueira<sup>8</sup>, Fabiano L. Thompson<sup>7,9</sup>, Cristina Lemos<sup>10</sup>, Betina Durovni<sup>10</sup>, José Cerbino-Neto<sup>1</sup>, Carlos M. Morel<sup>11</sup>, W. Ian Lipkin<sup>2,\*,#,¥</sup>, Nischay Mishra<sup>2, ¥</sup>

#- These authors contributed equally as first authors.

¥ - These authors contributed equally as last authors

\*- Corresponding authors (see footnote)

#### **Affiliations:**

1 – Instituto Nacional de Infectologia (INI), Fundação Oswaldo Cruz (Fiocruz), Rio de Janeiro, RJ, Brazil.

2 – Center for Infection and Immunity, Mailman School of Public Health, Columbia University, New York, New York, USA.

3 – Laboratório de AIDS e imunologia Molecular, Instituto Oswaldo Cruz (IOC), Fiocruz, Rio de Janeiro, RJ, Brazil.

4 – Laboratório de Vírus Respiratório e do Sarampo, IOC, Fiocruz, Rio de Janeiro, RJ, Brazil.

- 5 – Laboratório de Imunofarmacologia, IOC, Fiocruz, Rio de Janeiro, RJ, Brazil.
- 6 – D'Or Institute for Research and Education (IDOR), Rio de Janeiro, RJ, Brazil.
- 7 – Instituto de Biologia, Universidade Federal do Rio de Janeiro (UFRJ), Rio de Janeiro, RJ, Brazil.
- 8 – Laboratório de Flavivírus, IOC, Fiocruz, Rio de Janeiro, RJ, Brazil.
- 9 – SAGE/COPPE, UFRJ, Rio de Janeiro, RJ, Brazil.
- 10 - Secretaria Municipal de Saúde, Rio de Janeiro, Brazil
- 11 – National Institute for Science and Technology on Innovation on Diseases of Neglected Populations (INCT/IDPN), Center for Technological Development in Health (CDTS), Fiocruz, Rio de Janeiro, RJ, Brazil.

\* Corresponding authors:

Thiago Moreno L. Souza, Centro de Desenvolvimento Tecnológico em Saúde - CDTS, FIOCRUZ. Av. Brasil, nº 4365, Manguinhos - RJ. Cep: 21045-900. Rio de Janeiro, RJ, Brasil. Tel: (+ 55 21) 2562-1311; e-mail: [tmoreno@cdts.fiocruz.br](mailto:tmoreno@cdts.fiocruz.br)

W.Ian Lipkin, Center for Infection and Immunity, Mailman School of Public Health of Columbia University, 722 West 168th Street, New York, NY 10032, USA. Tel : (212) 342-9033 ; email : [wil2001@cumc.columbia.edu](mailto:wil2001@cumc.columbia.edu)

## **Downstream processing of the Full genome sequencing using VirCapSeq-VERT platform**

Sequencing on the Illumina MiSeq platform (Illumina, San Diego, CA, USA) resulted in 30,393,722 (300 bp) paired end reads. The demultiplexed FastQ files were adapter trimmed using cutadapt program (v 1.8.3). Adaptor trimming was followed by generation of quality reports using FastQC software (v 0.11.5) which were used to determine filtering criteria based on average quality scores of the reads, presence of indeterminate nucleotides and homopolymeric reads. The reads were quality filtered and end-trimmed with PRINSEQ software (v 0.20.3). The filtered fastq files were mapped to the complete genome sequence of Chikungunya virus using Bowtie 2 mapper (v 2.2.9). The consensus genome sequences from mapping assemblies were obtained using SAM Tools (v 1.3.1) and Bcftools (v 1.3.1). The genome variation was analyzed using in-house perl scripts to count the frequency of nucleotides at each position with reference to the Chikungunya genome.

### **Read processing**

The demultiplexed FastQ files were adapter trimmed using cutadapt program (v 1.8.3)<sup>5</sup>. Adaptor trimming was followed by generation of quality reports using FastQC software (v 0.11.5) which were used to determine filtering criteria based on average quality scores of the reads, presence of indeterminate nucleotides and homopolymeric reads<sup>6</sup>. Reads were quality filtered and end-trimmed<sup>7</sup> with PRINSEQ software (v 0.20.3)<sup>7</sup>. The filtered fastq files were mapped to the complete genome sequence of CHIKV using Bowtie2 mapper (v 2.2.9)<sup>8</sup>. The consensus genome sequences from mapping assemblies were obtained using SAM Tools (v 1.3.1) and Bcftools (v 1.3.1)<sup>9</sup>. Genome variation was

analyzed using in-house perl scripts to count the frequency of nucleotides at each position with reference to the Chikungunya genome.

### **Unbiased-NGS**

Additionally, two further CHIKV positive samples from 2015 were sequenced by unbiased shotgun sequencing. In brief, 0.3 mL plasma aliquot was extracted using QIAamp Viral RNA Mini Kit (Qiagen®) with RNase-free DNase (Qiagen®) treatment, omitting carrier RNA. Double-stranded cDNA libraries were constructed using a TruSeq Stranded Total RNA LT kit (Illumina®) with Ribo-zero treatment. The library size distribution was assessed using a 2100 Bioanalyzer (Agilent®) with a High Sensitivity DNA kit (Agilent®), and the quantification was performed using a 7500 Real-time PCR System (Applied Biosystems®) with a KAPA Library Quantification Kit (Kapa Biosystems). Paired-end sequencing (2 x 300 bp) was performed with a MiSeq Reagent kit v3 (Illumina®). The sequences obtained were preprocessed using the PRINSEQ software to remove reads smaller than 50 bp and sequences with scores of lower quality than a Phred quality score of 20. Paired-End reAd merger (PEAR) software was used to merge and extend the paired-end Illumina reads using the default parameter. The extended reads were analyzed against the Human Genome Database using the DeconSeq program, with an identity and coverage cutoff of 70%, to remove human RNA sequences. Non-human reads were analyzed against all GenBank viral genomes (65,052 sequences) using the BLAST software with a 1e-5 e-value cutoff. The sequences rendering a genome were assembled with SPAdes 3.7.1 software<sup>10</sup> followed by a second assembly with the CAP3 program using default parameters<sup>11</sup>.

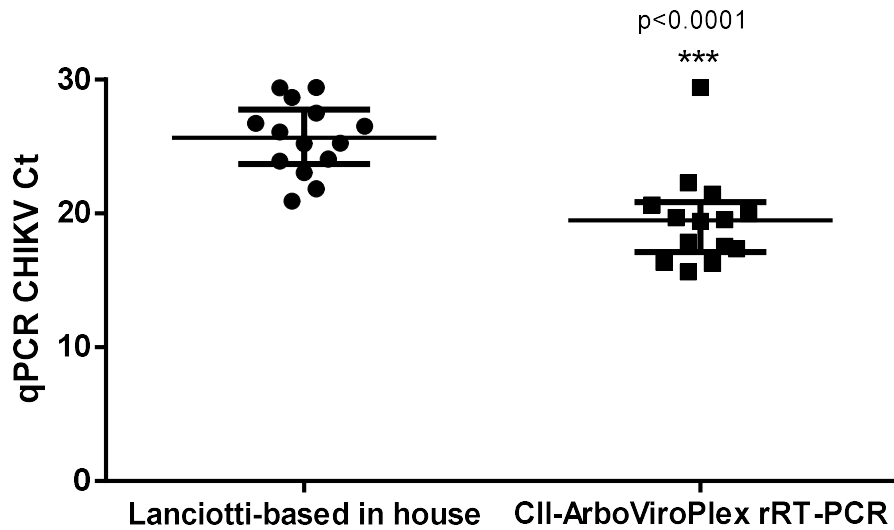

**Figure S1. Comparison of diagnostic sensitivities among different acid nucleic extraction and RT-PCR methodologies.** CHIKV cycle threshold (Ct) values obtained for 14 RNA samples collected between Feb 2016 - Feb 2017 processed by column-based extraction methods and qPCR *in house*<sup>1-3</sup> ranged from 20.92 to 29.42. Ct values obtained for the same samples after extraction methods based on magnetic beads and the new 5-ArboViroPlex qPCR<sup>4</sup> ranged from 16.3-29.41. Statistical analysis to compare sensitivities of CHIKV molecular diagnostics was performed in accordance with paired t test (95% confidence intervals). A p-value < 0.05 was considered statistically significant. CHIKV viral load values were significantly higher by using an automated purification method and the 5-ArboViroPlex qPCR (p < 0.0001).

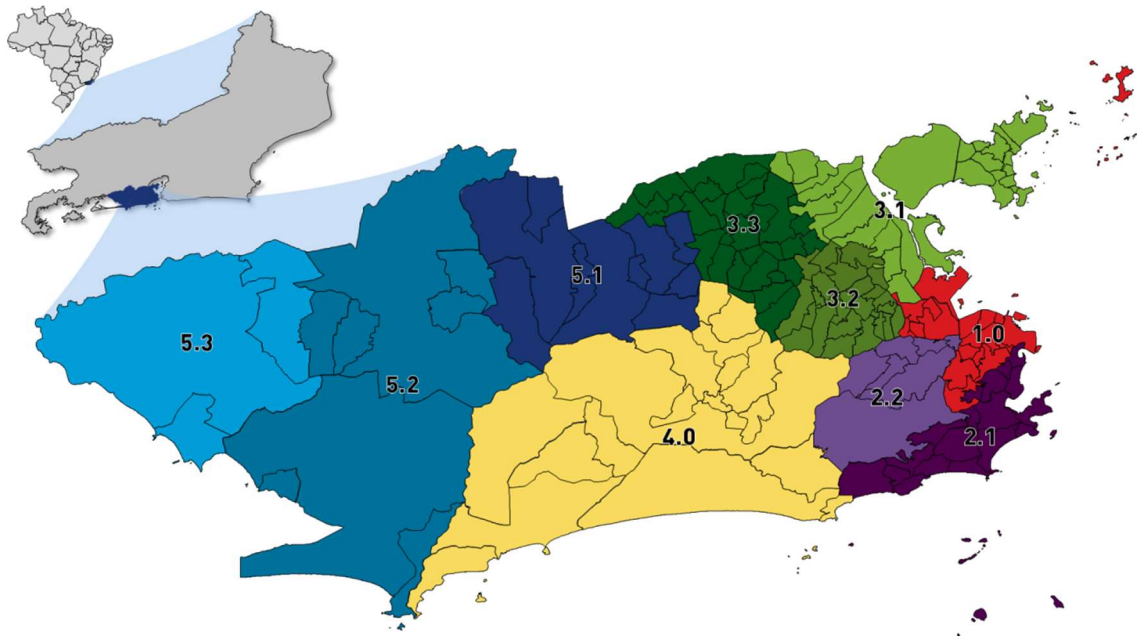

**Figure S2.** The City of Rio de Janeiro, Brazil and its planning areas (AP), distributed according to municipal administration.

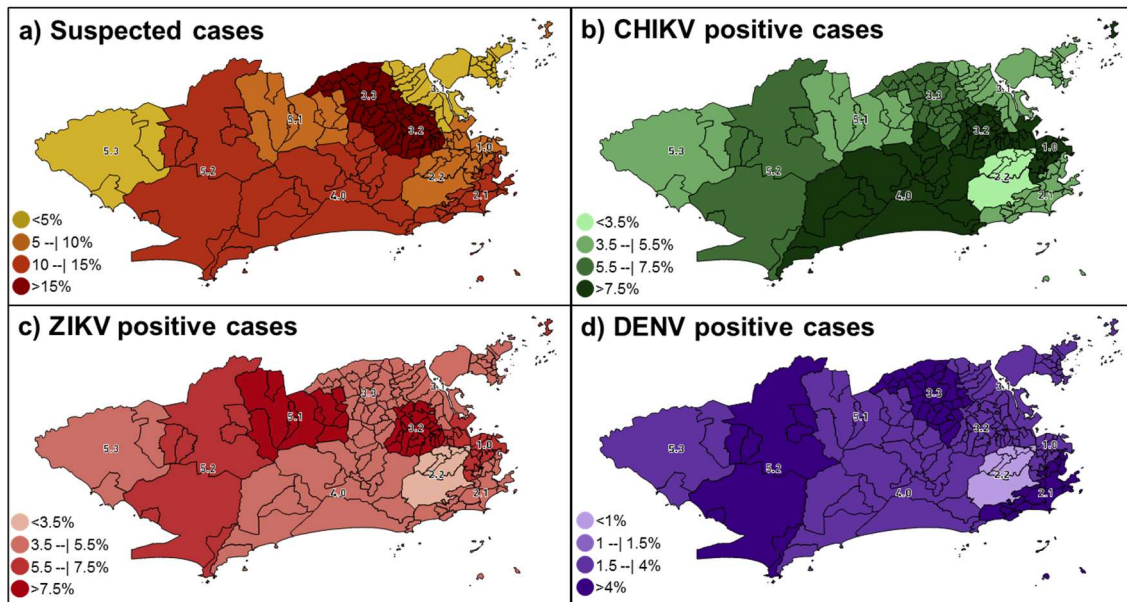

**Figure S3. Geographic distribution of suspected and positive cases for arboviruses in the city of Rio de Janeiro, Brazil, from March 2016 to June 2017.** Percentage of suspected (a) and positive cases for CHIKV (b), ZIKV (c) and DENV-4 (d) by PA. For guidance, the site where the patient was medically assisted was taken as reference. These percentages are not absolute indications that a certain PA is more affected by one virus than another. Because individuals may live in PA, work and seek for medical assistance in other regions. These data robustly show that cases of either DENV, ZIKV and CHIKV are widespread throughout the city.

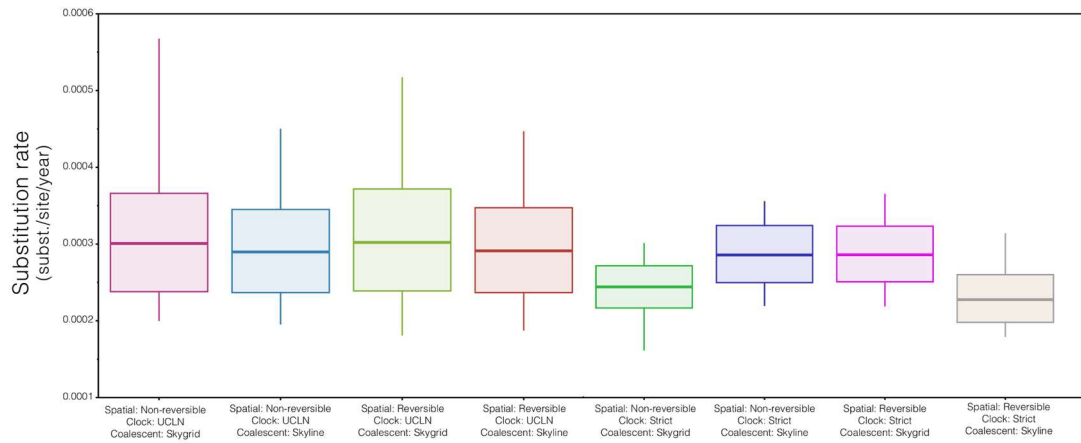

**Figure S4. BEAST estimates of the CHIKV ECSA substitution rates employing different model combinations.** The box plots represent the median substitution rates (substitutions/site/year) and the 95% Bayesian credible intervals of the posterior distributions estimated under each model combination as informed in the x-axis.



**Table S1.** Description of published primer/probe sets used in qPCR.

| <b>Virus Target</b> | <b>Reference</b>                              | <b>Primer/Probe</b> | <b>Genome Position</b> | <b>Sequence (5' - 3')</b>                            |
|---------------------|-----------------------------------------------|---------------------|------------------------|------------------------------------------------------|
| ZIKV                | Lanciotti<br><i>et al</i> , 2008 <sup>1</sup> | Primer F            | 1086-1102              | CCG CTG CCC AAC ACA AG                               |
|                     |                                               | Primer R            | 1162-1139              | CCA CTA ACG TTC TTT TGC AGA CAT                      |
|                     |                                               | Probe               | 1107-1137              | FAM/ AGC CTA CCT TGA CAA GCA GTC AGA CAC TCA A /BHQ1 |
| CHIKV               | Lanciotti<br><i>et al</i> , 2007 <sup>2</sup> | Primer F            | 874-894                | AAA GGG CAA ACT CAG CTT CAC                          |
|                     |                                               | Primer R            | 961-942                | GCC TGG GCT CAT CGT TAT TC                           |
|                     |                                               | Probe               | 899-923                | FAM/ CGC TGT GAT ACA GTG GTT TCG TGT G/BHQ1          |
| DENV1               | Santiago<br><i>et al</i> , 2013 <sup>3</sup>  | Primer F            | 8936-8955              | CAA AAG GAA GTC GYG CAA TA                           |
|                     |                                               | Primer R            | 9023-9047              | CTG AGT GAA TTC TCT CTG CTR AAC                      |
|                     |                                               | Probe               | 8961-8979              | FAM/CAT GTG GYT GGG AGC RCG C/BHQ1                   |
| DENV2               | Santiago<br><i>et al</i> , 2013 <sup>3</sup>  | Primer F            | 1426-1447              | CAG GCT ATG GCA CYG TCA CGA T                        |
|                     |                                               | Primer R            | 1482-1504              | CCA TYT GCA GCA RCA CCA TCT C                        |
|                     |                                               | Probe               | 1454-1480              | VIC/CTC YCC RAG AAC GGG CCT CGA CTT CAA/BHQ1         |
| DENV3               | Santiago<br><i>et al</i> , 2013 <sup>3</sup>  | Primer F            | 701-720                | GGA CTR GAC ACA CGC ACC CA                           |
|                     |                                               | Primer R            | 749-775                | CAT GTC TCT ACC TTC TCG ACT TGY CT                   |
|                     |                                               | Probe               | 722-747                | FAM/ACC TGG ATG TCG GCT GAA GGA GCY TG/BHQ1          |
| DENV4               | Santiago<br><i>et al</i> , 2013 <sup>3</sup>  | Primer F            | 884-904                | TTG TCC TAA TGA TGC TRG TCG                          |
|                     |                                               | Primer R            | 953-973                | TCC ACC YGA GAC TCC TTC CA                           |
|                     |                                               | Probe               | 939-965                | FAM/TYC CTA CYC CTA CGC ATC GCA TTC CG/BHQ1          |

*\*Bibliographical references are indicated at the end of this file*

Table S2 - Quality control of genome assembly

| Sample Name            | GenBank ID | Collection date | Collection site* | Lancioti-based in house Cts | CI Arboviro-Plex Cts | Sequence technology | Number rawfastq reads | Number input reads | Number mapped reads | Mapped reads (%) | Genome length | CHIKV used for mapping reference | Refseq Length | Number Mapped Pos Ref (Length Genome Recovered) | Genome Recovered (%) | Avg. depth/bp | Avg. unmapped length | Longest Unmapped Start | Longest Unmapped End |
|------------------------|------------|-----------------|------------------|-----------------------------|----------------------|---------------------|-----------------------|--------------------|---------------------|------------------|---------------|----------------------------------|---------------|-------------------------------------------------|----------------------|---------------|----------------------|------------------------|----------------------|
| BRZ-10_S8_L001_R1_001  | MG649972   | May 04, 2016    | PA 1.0           | 26.08                       | 16.30                | ViralCapSeq-VERT    | 2,71E+06              | 2,69E+06           | 7,86E+05            | 29.71            | 1,17E+04      | NC_004162.2                      | 1,18E+04      | 1,18E+04                                        | 99.72                | 6299          | 33                   | 1,18E+04               | 1,18E+04             |
| BRZ-12_S9_L001_R1_001  | MG649982   | Mar 19, 2017    | PA 5.2           | 26.50                       | 19.54                | ViralCapSeq-VERT    | 2,27E+06              | 2,19E+06           | 1,01E+06            | 46.26            | 1,28E+04      | NC_004162.2                      | 1,18E+04      | 1,18E+04                                        | 100                  | 12082         | NA                   | NA                     | NA                   |
| BRZ-14_S10_L001_R1_001 | MG649978   | Mar 14, 2017    | PA 5.2           | 26.74                       | 19.68                | ViralCapSeq-VERT    | 2,51E+06              | 2,41E+06           | 2,54E+05            | 10.53            | 1,17E+04      | NC_004162.2                      | 1,18E+04      | 1,18E+04                                        | 99.81                | 3104          | 22                   | 1,18E+04               | 1,18E+04             |
| BRZ-18_S11_L001_R1_001 | MG649991   | Aug 21, 2016    | PA 3.3           | 27.48                       | 21.44                | ViralCapSeq-VERT    | 1,36E+06              | 1,31E+06           | 1,69E+04            | 1.26             | 1,17E+04      | NC_004162.2                      | 1,18E+04      | 1,18E+04                                        | 99.66                | 202           | 40                   | 1,18E+04               | 1,18E+04             |
| BRZ-1_S1_L001_R1_001   | MG649977   | July 27, 2016   | PA 5.2           | 20.92                       | 17.55                | ViralCapSeq-VERT    | 2,27E+06              | 2,20E+06           | 2,54E+05            | 11.51            | 1,17E+04      | NC_004162.2                      | 1,18E+04      | 1,18E+04                                        | 99.79                | 3007          | 24                   | 1,18E+04               | 1,18E+04             |
| BRZ-20_S12_L001_R1_001 | MG649976   | Mar 28, 2016    | PA 1.0           | 28.66                       | 19.98                | ViralCapSeq-VERT    | 2,03E+06              | 1,96E+06           | 7,80E+04            | 3.99             | 1,17E+04      | NC_004162.2                      | 1,18E+04      | 1,18E+04                                        | 99.75                | 906           | 29                   | 1,18E+04               | 1,18E+04             |
| BRZ-2_S2_L001_R1_001   | MG649981   | Jul 27, 2016    | PA 3.2           | 21.84                       | 17.85                | ViralCapSeq-VERT    | 1,50E+06              | 1,44E+06           | 8,19E+04            | 5.89             | 1,17E+04      | NC_004162.2                      | 1,18E+04      | 1,18E+04                                        | 99.80                | 882           | 4                    | 1,18E+04               | 1,18E+04             |
| BRZ-37_S13_L001_R1_001 | MG649973   | Dec 12, 2016    | PA 4.0           | 23.40                       | 22.30                | ViralCapSeq-VERT    | 1,86E+06              | 1,82E+06           | 1,21E+05            | 6.63             | 1,17E+04      | NC_004162.2                      | 1,18E+04      | 1,18E+04                                        | 99.72                | 1363          | 32                   | 1,18E+04               | 1,18E+04             |
| BRZ-38_S14_L001_R1_001 | MG649970   | Mar 29, 2016    | PA 1.0           | 29.42                       | 20.63                | ViralCapSeq-VERT    | 1,21E+06              | 1,17E+06           | 4,01E+04            | 3.44             | 1,17E+04      | NC_004162.2                      | 1,18E+04      | 1,18E+04                                        | 99.56                | 477           | 51                   | 1,18E+04               | 1,18E+04             |
| BRZ-3_S3_L001_R1_001   | MG649974   | Apr 07, 2016    | PA 1.0           | 23.04                       | 15.63                | ViralCapSeq-VERT    | 3,66E+06              | 3,69E+06           | 4,00E+05            | 11.13            | 1,17E+04      | NC_004162.2                      | 1,18E+04      | 1,18E+04                                        | 99.73                | 4670          | 31                   | 1,18E+04               | 1,18E+04             |
| BRZ-4_S4_L001_R1_001   | MG649975   | Jul 24, 2016    | PA 3.2           | 23.91                       | 17.36                | ViralCapSeq-VERT    | 1,72E+06              | 1,67E+06           | 1,52E+05            | 9.09             | 1,17E+04      | NC_004162.2                      | 1,18E+04      | 1,18E+04                                        | 99.74                | 1906          | 30                   | 1,18E+04               | 1,18E+04             |
| BRZ-6_S5_L001_R1_001   | MG649983   | Mar 28, 2016    | PA 1.0           | 24.07                       | 19.42                | ViralCapSeq-VERT    | 2,22E+06              | 2,16E+06           | 6,74E+04            | 3.12             | 1,28E+04      | NC_004162.2                      | 1,18E+04      | 1,18E+04                                        | 100                  | 751           | NA                   | NA                     | NA                   |
| BRZ-7_S6_L001_R1_001   | MG649980   | Apr 26, 2016    | PA 1.0           | 23.20                       | 16.30                | ViralCapSeq-VERT    | 2,35E+06              | 2,28E+06           | 8,73E+05            | 38.29            | 1,17E+04      | NC_004162.2                      | 1,18E+04      | 1,18E+04                                        | 99.94                | 10198         | 7                    | 1,18E+04               | 1,18E+04             |
| BRZ-8_S7_L001_R1_001   | MG649979   | Mar 03, 2017    | PA 1.0           | 25.24                       | 29.41                | ViralCapSeq-VERT    | 2,86E+06              | 2,59E+06           | 3,29E+05            | 12.74            | 1,17E+04      | NC_004162.2                      | 1,18E+04      | 1,18E+04                                        | 99.89                | 3880          | 13                   | 1,18E+04               | 1,18E+04             |
| CHK_5_Brazil-RJ_2015   | MG649984   | 2015            | ND               | ND                          | ND                   | Unbiased sequence   | 2,15E+06              | 1,98E+06           | 1,53E+05            | 9.73             | 1,12E+04      | No reference                     | No reference  | 1,20E+04                                        | 100                  | 3790          | NA                   | NA                     | NA                   |
| CHK_7_Brazil-RJ_2015   | MG649985   | 2015            | ND               | ND                          | ND                   | Unbiased sequence   | 8,43E+05              | 7,64E+05           | 5,18E+02            | 0.07             | 1,12E+04      | No reference                     | No reference  | 1,12E+04                                        | 95.02                | 19.72         | NA                   | NA                     | NA                   |

\*Reference to Figure S3

Legend:

ND - Not determined (donated by Arbovirus Reference Laboratory and derived from their surveillance)

NA - Not applicable

**Table S3.** Chikungunya virus complete-genome sequences used for phylogenetic analyses.

| <b>Accession Number</b> | <b>Analysis</b> | <b>Country</b>    | <b>Host</b>  | <b>Isolation source</b>         | <b>Collection date</b> | <b>Passage history</b>  |
|-------------------------|-----------------|-------------------|--------------|---------------------------------|------------------------|-------------------------|
| KR559493                | ML              | American Samoa    |              |                                 | 2014                   |                         |
| HM045823                | ML              | Angola            |              |                                 | 1962                   |                         |
| KY435455                | ML              | Anguilla          | Homo sapiens | cell culture supernatant (vero) | 12/nov/14              | Passage in cell culture |
| KY435483                | ML              | Anguilla          | Homo sapiens | cell culture supernatant (vero) | 12-Feb-2014            | Passage in cell culture |
| KY435479                | ML              | Antigua - Barbuda | Homo sapiens | cell culture supernatant (vero) | 28-Apr-2014            | Passage in cell culture |
| KY435470                | ML              | Bahamas           | Homo sapiens | cell culture supernatant (vero) | 08/jul/14              | Passage in cell culture |
| FJ807898                | ML              | Bangladesh        | Homo sapiens | infected patient                | 2008                   |                         |
| KU365370                | ML              | Bangladesh        | Homo sapiens |                                 | nov/11                 |                         |
| KU365371                | ML              | Bangladesh        | Homo sapiens |                                 | nov/11                 |                         |
| KY435464                | ML              | Barbados          | Homo sapiens | cell culture supernatant (vero) | 15-Aug-2014            | Passage in cell culture |
| KY435466                | ML              | Barbados          | Homo sapiens | cell culture supernatant (vero) | 06-Aug-2014            | Passage in cell culture |
| KP164568                | ML              | Brazil            | Homo sapiens |                                 | 26-Aug-2014            |                         |
| KP164570                | ML              | Brazil            | Homo sapiens |                                 | 03-Sep-2014            |                         |
| KP164571                | ML              | Brazil            | Homo sapiens |                                 | 03/jul/14              |                         |
| KP164572                | ML              | Brazil            | Homo sapiens |                                 | 21-Aug-2014            |                         |

|              |                  |        |                  |  |                     |  |
|--------------|------------------|--------|------------------|--|---------------------|--|
| KT581<br>023 | ML               | Brazil | Homo<br>sapiens  |  | 2014                |  |
| KU355<br>832 | ML               | Brazil | Homo<br>sapiens  |  | 2015                |  |
| KU940<br>225 | ML               | Brazil | Homo<br>sapiens  |  | 15/jul<br>/15       |  |
| KU940<br>226 | ML               | Brazil | Homo<br>sapiens  |  | 01-<br>Aug-<br>2015 |  |
| KX228<br>391 | ML               | Brazil | Homo<br>sapiens  |  | 03/ma<br>r/16       |  |
| KY055<br>011 | ML               | Brazil | Aedes<br>aegypti |  | 20-<br>Feb-<br>2016 |  |
| KY704<br>933 | ML<br>/Ba<br>yes | Brazil | Homo<br>sapiens  |  | 30/ma<br>r/16       |  |
| KY704<br>934 | ML<br>/Ba<br>yes | Brazil | Homo<br>sapiens  |  | 30/ma<br>r/16       |  |
| KY704<br>935 | ML<br>/Ba<br>yes | Brazil | Homo<br>sapiens  |  | 01-<br>Apr-<br>2016 |  |
| KY704<br>936 | ML<br>/Ba<br>yes | Brazil | Homo<br>sapiens  |  | 01-<br>Apr-<br>2016 |  |
| KY704<br>937 | ML<br>/Ba<br>yes | Brazil | Homo<br>sapiens  |  | 15-<br>Apr-<br>2016 |  |
| KY704<br>938 | ML<br>/Ba<br>yes | Brazil | Homo<br>sapiens  |  | 19-<br>Apr-<br>2016 |  |
| KY704<br>939 | ML<br>/Ba<br>yes | Brazil | Homo<br>sapiens  |  | 17-<br>Apr-<br>2016 |  |
| KY704<br>940 | ML<br>/Ba<br>yes | Brazil | Homo<br>sapiens  |  | 14-<br>Apr-<br>2016 |  |
| KY704<br>941 | ML<br>/Ba<br>yes | Brazil | Homo<br>sapiens  |  | 14-<br>Apr-<br>2016 |  |
| KY704<br>942 | ML<br>/Ba<br>yes | Brazil | Homo<br>sapiens  |  | 16-<br>Apr-<br>2016 |  |

|              |                  |               |                 |  |                     |  |
|--------------|------------------|---------------|-----------------|--|---------------------|--|
| KY704<br>943 | ML<br>/Ba<br>yes | Brazil        | Homo<br>sapiens |  | 19-<br>Apr-<br>2016 |  |
| KY704<br>944 | ML<br>/Ba<br>yes | Brazil        | Homo<br>sapiens |  | 19-<br>Apr-<br>2016 |  |
| KY704<br>945 | ML<br>/Ba<br>yes | Brazil        | Homo<br>sapiens |  | 14-<br>Apr-<br>2016 |  |
| KY704<br>946 | ML<br>/Ba<br>yes | Brazil        | Homo<br>sapiens |  | 17-<br>Apr-<br>2016 |  |
| KY704<br>947 | ML<br>/Ba<br>yes | Brazil        | Homo<br>sapiens |  | 15-<br>Apr-<br>2016 |  |
| KY704<br>948 | ML<br>/Ba<br>yes | Brazil        | Homo<br>sapiens |  | 19-<br>Apr-<br>2016 |  |
| KY704<br>949 | ML<br>/Ba<br>yes | Brazil        | Homo<br>sapiens |  | 07-<br>Apr-<br>2016 |  |
| KY704<br>950 | ML<br>/Ba<br>yes | Brazil        | Homo<br>sapiens |  | 07-<br>Apr-<br>2016 |  |
| KY704<br>951 | ML<br>/Ba<br>yes | Brazil        | Homo<br>sapiens |  | 13-<br>Apr-<br>2016 |  |
| KY704<br>952 | ML<br>/Ba<br>yes | Brazil        | Homo<br>sapiens |  | 07-<br>Apr-<br>2016 |  |
| KY704<br>953 | ML<br>/Ba<br>yes | Brazil        | Homo<br>sapiens |  | 09-<br>Apr-<br>2016 |  |
| KY704<br>954 | ML<br>/Ba<br>yes | Brazil        | Homo<br>sapiens |  | 20/jun<br>/16       |  |
| KY704<br>955 | ML<br>/Ba<br>yes | Brazil        | Homo<br>sapiens |  | 17/jun<br>/16       |  |
| KP164<br>567 | ML               | Brazil-<br>AP | Homo<br>sapiens |  | 28-<br>Aug-<br>2014 |  |
| KP164<br>569 | ML               | Brazil-<br>BA | Homo<br>sapiens |  | 28-<br>Aug-<br>2014 |  |

|              |                  |                   |                                   |                                    |                     |                                                                      |
|--------------|------------------|-------------------|-----------------------------------|------------------------------------|---------------------|----------------------------------------------------------------------|
| KY124<br>328 | ML               | Brazil-<br>RJ     | Homo<br>sapiens                   | patient with febrile illness       | 16/ma<br>r/16       |                                                                      |
| KY124<br>329 | ML               | Brazil-<br>RJ     | Homo<br>sapiens                   | patient with febrile illness       | 16/ma<br>r/16       |                                                                      |
| KJ4516<br>24 | ML               | British<br>Virgin | Homo<br>sapiens                   |                                    | jan/14              |                                                                      |
| KY435<br>486 | ML               | British<br>Virgin | Homo<br>sapiens                   | cell culture supernatant<br>(vero) | 23/jan<br>/14       | Passage in cell culture                                              |
| JQ8612<br>53 | ML               | Cambod<br>ia      | Homo<br>sapiens                   |                                    | 16-<br>Aug-<br>2011 |                                                                      |
| JQ8612<br>54 | ML               | Cambod<br>ia      | Homo<br>sapiens                   |                                    | 16-<br>Aug-<br>2011 |                                                                      |
| JQ8612<br>55 | ML               | Cambod<br>ia      | Homo<br>sapiens                   |                                    | 16-<br>Aug-<br>2011 |                                                                      |
| JQ8612<br>56 | ML               | Cambod<br>ia      | Homo<br>sapiens                   |                                    | 16-<br>Aug-<br>2011 |                                                                      |
| JQ8612<br>57 | ML               | Cambod<br>ia      | Homo<br>sapiens                   |                                    | 16-<br>Aug-<br>2011 |                                                                      |
| JQ8612<br>58 | ML               | Cambod<br>ia      | Homo<br>sapiens                   |                                    | 16-<br>Aug-<br>2011 |                                                                      |
| JQ8612<br>59 | ML               | Cambod<br>ia      | Homo<br>sapiens                   |                                    | 26-<br>May-<br>2011 |                                                                      |
| JQ8612<br>60 | ML               | Cambod<br>ia      | Homo<br>sapiens                   |                                    | 28-<br>May-<br>2011 |                                                                      |
| KX262<br>996 | ML<br>/Ba<br>yes | Camero<br>on      | Homo<br>sapiens                   |                                    | 2006                | passage history: Vero 3;<br>genotype: East-Central-<br>South-African |
| HM045<br>784 | ML<br>/Ba<br>yes | CAR               | Anopheles<br>(Ceilia)<br>funestus |                                    | 19/no<br>v/84       |                                                                      |
| HM045<br>822 | ML<br>/Ba<br>yes | CAR               | Homo<br>sapiens                   |                                    | Oct-<br>1978        |                                                                      |
| KY038<br>946 | ML<br>/Ba<br>yes | CAR               | Aedes<br>opok                     |                                    | jun/75              | viral sample derived from a<br>lyophilized vial                      |

|              |                  |                    |                 |                                    |                     |                                                                     |
|--------------|------------------|--------------------|-----------------|------------------------------------|---------------------|---------------------------------------------------------------------|
| KY038<br>947 | ML<br>/Ba<br>yes | CAR                | Homo<br>sapiens |                                    | Dec-<br>1983        | viral sample derived from a<br>lyophilized vial;<br>CRORAcollection |
| KY435<br>459 | ML               | Cayman<br>-Islands | Homo<br>sapiens | cell culture supernatant<br>(vero) | 17-<br>Sep-<br>2014 | Passage in cell culture                                             |
| KY435<br>460 | ML               | Cayman<br>-Islands | Homo<br>sapiens | cell culture supernatant<br>(vero) | 06/jul<br>/14       | Passage in cell culture                                             |
| GU199<br>350 | ML               | China              | Homo<br>sapiens | serum                              | 2008                |                                                                     |
| GU199<br>351 | ML               | China              | Homo<br>sapiens | serum                              | 2008                | passaged once in Vero cells                                         |
| GU199<br>352 | ML               | China              | Homo<br>sapiens | serum                              | 2008                |                                                                     |
| GU199<br>353 | ML               | China              | Homo<br>sapiens | serum                              | 2008                |                                                                     |
| HQ846<br>356 | ML               | China              | Homo<br>sapiens | serum                              | Oct-<br>2010        |                                                                     |
| HQ846<br>357 | ML               | China              | Homo<br>sapiens | serum                              | Oct-<br>2010        |                                                                     |
| HQ846<br>358 | ML               | China              | Homo<br>sapiens | serum                              | Oct-<br>2010        |                                                                     |
| HQ846<br>359 | ML               | China              | Homo<br>sapiens | serum                              | Oct-<br>2010        |                                                                     |
| JQ0658<br>85 | ML               | China              | Homo<br>sapiens |                                    | Oct-<br>2010        |                                                                     |
| JQ0658<br>86 | ML               | China              | Homo<br>sapiens |                                    | Oct-<br>2010        |                                                                     |
| JQ0658<br>87 | ML               | China              | Homo<br>sapiens |                                    | Oct-<br>2010        |                                                                     |
| JQ0658<br>88 | ML               | China              | Homo<br>sapiens |                                    | Oct-<br>2010        |                                                                     |
| JQ0658<br>89 | ML               | China              | Homo<br>sapiens |                                    | Oct-<br>2010        |                                                                     |
| JQ0658<br>90 | ML               | China              | Homo<br>sapiens |                                    | Oct-<br>2010        |                                                                     |
| JQ0658<br>91 | ML               | China              | Homo<br>sapiens |                                    | Oct-<br>2010        |                                                                     |
| JQ0658<br>92 | ML               | China              | Homo<br>sapiens |                                    | Oct-<br>2010        |                                                                     |
| JX0887<br>05 | ML               | China              | Homo<br>sapiens |                                    | 2010                |                                                                     |

|              |                  |                                |                            |                                    |                     |                         |
|--------------|------------------|--------------------------------|----------------------------|------------------------------------|---------------------|-------------------------|
| KC488<br>650 | ML               | China                          | Homo<br>sapiens            | infected patient                   | 2012                |                         |
| KF318<br>729 | ML               | China                          | Homo<br>sapiens            |                                    | 06/jul<br>/12       |                         |
| KR559<br>491 | ML               | Colombi<br>a                   |                            |                                    | Aug-<br>2014        |                         |
| KU365<br>372 | ML               | Colombi<br>a                   | Homo<br>sapiens            |                                    | 18-<br>Dec-<br>2014 |                         |
| KU365<br>373 | ML               | Colombi<br>a                   | Homo<br>sapiens            |                                    | Dec-<br>2014        |                         |
| KX496<br>989 | ML               | Colombi<br>a                   | Homo<br>sapiens            | blood                              | 09-<br>Feb-<br>2016 |                         |
| KF283<br>986 | ML               | Comoro<br>s                    | Homo<br>sapiens            |                                    | 2005                |                         |
| KF283<br>987 | ML               | Comoro<br>s                    | Homo<br>sapiens            |                                    | 2005                |                         |
| KP702<br>297 | ML               | Comoro<br>s                    | Homo<br>sapiens            |                                    | 2005                |                         |
| KP003<br>813 | ML<br>/Ba<br>yes | Congo                          | Homo<br>sapiens            |                                    | 2011                |                         |
| HM045<br>818 | ML               | Cote-<br>dIvoire               | Aedes<br>luteocephal<br>us |                                    | Sep-<br>1981        |                         |
| HM045<br>820 | ML               | Cote-<br>dIvoire               | Aedes<br>africanus         |                                    | Dec-<br>1993        |                         |
| KY435<br>484 | ML               | Dominic<br>a                   | Homo<br>sapiens            | cell culture supernatant<br>(vero) | 30/jan<br>/14       | Passage in cell culture |
| KY435<br>485 | ML               | Dominic<br>a                   | Homo<br>sapiens            | cell culture supernatant<br>(vero) | 28/jan<br>/14       | Passage in cell culture |
| KR559<br>477 | ML               | Dominic<br>an-<br>Republi<br>c |                            |                                    | jul/14              |                         |
| KR559<br>479 | ML               | Dominic<br>an-<br>Republi<br>c |                            |                                    | Apr-<br>2014        |                         |
| KR559<br>498 | ML               | Dominic<br>an-<br>Republi<br>c |                            |                                    | mar/1<br>4          |                         |



|              |                  |                                |                 |      |              |  |
|--------------|------------------|--------------------------------|-----------------|------|--------------|--|
| KY272<br>961 | ML               | Dominic<br>an-<br>Republi<br>c | Homo<br>sapiens | sera | 2014         |  |
| KY272<br>962 | ML               | Dominic<br>an-<br>Republi<br>c | Homo<br>sapiens | sera | 2014         |  |
| KY272<br>963 | ML               | Dominic<br>an-<br>Republi<br>c | Homo<br>sapiens | sera | 2014         |  |
| KY272<br>964 | ML               | Dominic<br>an-<br>Republi<br>c | Homo<br>sapiens | sera | 2014         |  |
| KY272<br>965 | ML               | Dominic<br>an-<br>Republi<br>c | Homo<br>sapiens | sera | 2014         |  |
| KY272<br>966 | ML               | Dominic<br>an-<br>Republi<br>c | Homo<br>sapiens | sera | 2014         |  |
| KY272<br>967 | ML               | Dominic<br>an-<br>Republi<br>c | Homo<br>sapiens | sera | 2014         |  |
| KY272<br>968 | ML               | Dominic<br>an-<br>Republi<br>c | Homo<br>sapiens | sera | 2014         |  |
| KY272<br>969 | ML               | Dominic<br>an-<br>Republi<br>c | Homo<br>sapiens | sera | 2014         |  |
| KY272<br>970 | ML               | Dominic<br>an-<br>Republi<br>c | Homo<br>sapiens | sera | 2014         |  |
| HM045<br>809 | ML<br>/Ba<br>yes | DRC                            | Homo<br>sapiens |      | 1960         |  |
| KR559<br>471 | ML               | El-<br>Salvado<br>r            |                 |      | Oct-<br>2014 |  |

|              |          |                  |              |                                 |           |                                 |
|--------------|----------|------------------|--------------|---------------------------------|-----------|---------------------------------|
| KR559<br>472 | ML       | El-Salvador      |              |                                 | jun/14    |                                 |
| KR559<br>475 | ML       | El-Salvador      |              |                                 | Sep-2014  |                                 |
| KR559<br>484 | ML       | El-Salvador      |              |                                 | nov/14    |                                 |
| KP003<br>807 | ML       | France           | Homo sapiens |                                 | 2006      |                                 |
| KR559<br>473 | ML       | French Polynesia |              |                                 | Feb-2015  |                                 |
| KX262<br>994 | ML       | French-Guiana    | Homo sapiens |                                 | 21/jan/14 | passage history: C636#2, Vero 1 |
| KP003<br>812 | ML/Bayes | Gabon            | Homo sapiens |                                 | 2007      |                                 |
| KY435<br>469 | ML       | Grenada          | Homo sapiens | cell culture supernatant (vero) | 30/jul/14 | Passage in cell culture         |
| KY435<br>472 | ML       | Grenada          | Homo sapiens | cell culture supernatant (vero) | 16/jun/14 | Passage in cell culture         |
| KX262<br>992 | ML       | Guadeloupe       | Homo sapiens |                                 | 05/jan/14 | passage history: C636#2, Vero 1 |
| LN898<br>094 | ML       | Guadeloupe       | Homo sapiens |                                 | jan/14    |                                 |
| LN898<br>097 | ML       | Guadeloupe       | Homo sapiens |                                 | jan/14    |                                 |
| LN898<br>098 | ML       | Guadeloupe       | Homo sapiens |                                 | jan/14    |                                 |
| LN898<br>099 | ML       | Guadeloupe       | Homo sapiens |                                 | jan/14    |                                 |
| LN898<br>102 | ML       | Guadeloupe       | Homo sapiens |                                 | jan/14    |                                 |
| LN898<br>103 | ML       | Guadeloupe       | Homo sapiens |                                 | jan/14    |                                 |
| LN898<br>110 | ML       | Guadeloupe       | Homo sapiens |                                 | jan/14    |                                 |
| LN898<br>111 | ML       | Guadeloupe       | Homo sapiens |                                 | jan/14    |                                 |
| KR559<br>481 | ML       | Guatemala        |              |                                 | Sep-2014  |                                 |

|              |    |        |                 |                                    |                     |                         |
|--------------|----|--------|-----------------|------------------------------------|---------------------|-------------------------|
| KR559<br>490 | ML | Guyana |                 |                                    | Aug-<br>2014        |                         |
| KR559<br>496 | ML | Guyana |                 |                                    | Jul/14              |                         |
| KY435<br>458 | ML | Guyana | Homo<br>sapiens | cell culture supernatant<br>(vero) | 03/no<br>v/14       | Passage in cell culture |
| KY435<br>477 | ML | Guyana | Homo<br>sapiens | cell culture supernatant<br>(vero) | 31-<br>May-<br>2014 | Passage in cell culture |
| KY435<br>478 | ML | Guyana | Homo<br>sapiens | cell culture supernatant<br>(vero) | 17-<br>May-<br>2014 | Passage in cell culture |
| KR559<br>476 | ML | Haiti  |                 |                                    | Jul/14              |                         |
| KR559<br>478 | ML | Haiti  |                 |                                    | May-<br>2014        |                         |
| KX702<br>401 | ML | Haiti  | Homo<br>sapiens | plasma                             | 02/jun<br>/14       |                         |
| KX702<br>402 | ML | Haiti  | Homo<br>sapiens | plasma                             | 09/jun<br>/14       |                         |
| KY415<br>978 | ML | Haiti  | Homo<br>sapiens | plasma                             | 29-<br>May-<br>2014 |                         |
| KY415<br>979 | ML | Haiti  | Homo<br>sapiens | plasma                             | 29-<br>May-<br>2014 |                         |
| KY415<br>980 | ML | Haiti  | Homo<br>sapiens | plasma                             | 05/jun<br>/14       |                         |
| KY415<br>981 | ML | Haiti  | Homo<br>sapiens | plasma                             | 10/jun<br>/14       |                         |
| KY415<br>982 | ML | Haiti  | Homo<br>sapiens | plasma                             | 11/jun<br>/14       |                         |
| KY415<br>983 | ML | Haiti  | Homo<br>sapiens | plasma                             | 02/jun<br>/14       |                         |
| KY415<br>984 | ML | Haiti  | Homo<br>sapiens | plasma                             | 24/jun<br>/14       |                         |
| KY415<br>985 | ML | Haiti  | Homo<br>sapiens | plasma                             | 13-<br>Aug-<br>2014 |                         |
| KY435<br>480 | ML | Haiti  | Homo<br>sapiens | cell culture supernatant<br>(vero) | 27-<br>Apr-<br>2014 | Passage in cell culture |

|              |    |          |              |                                       |             |                           |
|--------------|----|----------|--------------|---------------------------------------|-------------|---------------------------|
| KR559<br>487 | ML | Honduras |              |                                       | jul/14      |                           |
| KR559<br>488 | ML | Honduras |              |                                       | Sep-2014    |                           |
| EF210<br>157 | ML | India    | Homo sapiens |                                       | 2006        |                           |
| EU372<br>006 | ML | India    | Homo sapiens |                                       | 11/jun/07   |                           |
| EU564<br>335 | ML | India    | Homo sapiens | supernatant of infected Vero B4 cells | 31-Oct-2006 | passaged in Vero B4 cells |
| FJ0000<br>62 | ML | India    | Homo sapiens | CSF                                   | Sep-2006    |                           |
| FJ0000<br>63 | ML | India    | Homo sapiens | CSF                                   | Oct-2006    |                           |
| FJ0000<br>64 | ML | India    | Homo sapiens | CSF                                   | Sep-2006    |                           |
| FJ0000<br>65 | ML | India    | Homo sapiens | CSF                                   | Sep-2006    |                           |
| FJ0000<br>66 | ML | India    | Homo sapiens | serum                                 | Sep-2006    |                           |
| FJ0000<br>67 | ML | India    | Homo sapiens | CSF                                   | Aug-2006    |                           |
| FJ0000<br>68 | ML | India    | Homo sapiens | CSF                                   | Aug-2006    |                           |
| FJ0000<br>69 | ML | India    | Homo sapiens | serum                                 | jun/07      |                           |
| GQ428<br>210 | ML | India    | Homo sapiens | serum                                 | 07-Oct-2006 |                           |
| GQ428<br>211 | ML | India    | Homo sapiens | serum                                 | 07-Oct-2006 |                           |
| GQ428<br>212 | ML | India    | Homo sapiens | serum                                 | 12/jul/07   |                           |
| GQ428<br>213 | ML | India    | Homo sapiens | serum                                 | 13/jul/07   |                           |
| GQ428<br>214 | ML | India    | Homo sapiens | serum                                 | 29/jun/08   |                           |
| GQ428<br>215 | ML | India    | Homo sapiens | serum                                 | 29-May-2008 |                           |

|              |    |       |              |                                                                        |                     |  |
|--------------|----|-------|--------------|------------------------------------------------------------------------|---------------------|--|
| HM045<br>788 | ML | India | Homo sapiens |                                                                        | 1973                |  |
| HM045<br>803 | ML | India | Homo sapiens |                                                                        | 06/no<br>v/63       |  |
| HM045<br>806 | ML | India |              |                                                                        | 1986                |  |
| HM045<br>813 | ML | India | Homo sapiens |                                                                        | 06/no<br>v/63       |  |
| JF2740<br>82 | ML | India | Homo sapiens | serum                                                                  | 27-<br>Sep-<br>2006 |  |
| JN5588<br>34 | ML | India | Homo sapiens |                                                                        | 2009                |  |
| JN5588<br>35 | ML | India | Homo sapiens |                                                                        | 2008                |  |
| JN5588<br>36 | ML | India | Homo sapiens |                                                                        | 2009                |  |
| KJ6795<br>77 | ML | India | Homo sapiens | serum of a patient visiting<br>Calcutta School of<br>Tropical Medicine | 12-<br>Sep-<br>2011 |  |
| KJ6795<br>78 | ML | India | Homo sapiens | serum of a patient visiting<br>Calcutta School of<br>Tropical Medicine | 21-<br>Dec-<br>2011 |  |
| KJ7968<br>44 | ML | India |              | serum                                                                  | 04-<br>Aug-<br>2009 |  |
| KJ7968<br>45 | ML | India |              | serum                                                                  | 04-<br>Aug-<br>2009 |  |
| KJ7968<br>46 | ML | India |              | serum                                                                  | 18-<br>Aug-<br>2009 |  |
| KT336<br>777 | ML | India |              | human serum                                                            | 08-<br>Apr-<br>2009 |  |
| KT336<br>778 | ML | India |              | human serum                                                            | 16/jul<br>/10       |  |
| KT336<br>779 | ML | India |              | human serum                                                            | 03-<br>Aug-<br>2012 |  |
| KT336<br>780 | ML | India |              | human serum                                                            | 03-<br>Aug-<br>2012 |  |

|              |    |           |              |                  |             |                                                                   |
|--------------|----|-----------|--------------|------------------|-------------|-------------------------------------------------------------------|
| KT336<br>781 | ML | India     |              | human serum      | 06/mar/13   |                                                                   |
| KT336<br>782 | ML | India     |              | human serum      | 27-May-2013 |                                                                   |
| KX619<br>424 | ML | India     | Homo sapiens | serum            | 22-Sep-2015 |                                                                   |
| KX619<br>425 | ML | India     | Homo sapiens | serum            | 11-Sep-2015 |                                                                   |
| KX619<br>426 | ML | India     | Homo sapiens | serum            | 03-Dec-2015 |                                                                   |
| KY057<br>363 | ML | India     | Homo sapiens |                  | 28-Aug-2016 |                                                                   |
| KY751<br>908 | ML | India     | male patient |                  | 2016        |                                                                   |
| FJ8078<br>97 | ML | Indonesia | Homo sapiens | infected patient | 2007        |                                                                   |
| HM045<br>791 | ML | Indonesia | Homo sapiens |                  | 1983        |                                                                   |
| HM045<br>797 | ML | Indonesia | Homo sapiens |                  | 1985        |                                                                   |
| KC862<br>329 | ML | Indonesia | Homo sapiens | serum            | 2010        |                                                                   |
| KM673<br>291 | ML | Indonesia | Homo sapiens | serum            | jan/13      |                                                                   |
| EU244<br>823 | ML | Italy     |              |                  | 2007        |                                                                   |
| KP003<br>810 | ML | Italy     | Homo sapiens |                  | 2007        |                                                                   |
| KP003<br>811 | ML | Italy     | Homo sapiens |                  | 2007        |                                                                   |
| KX262<br>989 | ML | Italy     | Homo sapiens |                  | 2007        | passage history: P1, Vero 1; genotype: East-Central-South-African |
| KX262<br>993 | ML | Italy     | Homo sapiens |                  | 2007        | passage history: P1(3308), Vero 1                                 |
| KR559<br>489 | ML | Jamaica   |              |                  | Oct-2014    |                                                                   |

|              |    |                |                 |                                    |                     |                                 |
|--------------|----|----------------|-----------------|------------------------------------|---------------------|---------------------------------|
| KY435<br>461 | ML | Jamaica        | Homo<br>sapiens | cell culture supernatant<br>(vero) | 24-<br>Aug-<br>2014 | Passage in cell culture         |
| KY435<br>462 | ML | Jamaica        | Homo<br>sapiens | cell culture supernatant<br>(vero) | 25-<br>Aug-<br>2014 | Passage in cell culture         |
| KY435<br>468 | ML | Jamaica        | Homo<br>sapiens | cell culture supernatant<br>(vero) | 06-<br>Aug-<br>2014 | Passage in cell culture         |
| FR717<br>336 | ML | La-<br>Reunion | Homo<br>sapiens | host serum                         | 26-<br>Dec-<br>2005 |                                 |
| FR717<br>337 | ML | La-<br>Reunion | Homo<br>sapiens | host cornea                        | 26-<br>Dec-<br>2005 |                                 |
| KP003<br>808 | ML | Madaga<br>scar | Homo<br>sapiens |                                    | 2006                |                                 |
| EU703<br>759 | ML | Malaysi<br>a   | Homo<br>sapiens | infected patient                   | 2006                | passaged twice in C636<br>cells |
| EU703<br>760 | ML | Malaysi<br>a   | Homo<br>sapiens | infected patient                   | 2006                | passaged twice in C636<br>cells |
| EU703<br>761 | ML | Malaysi<br>a   | Homo<br>sapiens | infected patient                   | 2006                | passaged twice in C636<br>cells |
| EU703<br>762 | ML | Malaysi<br>a   | Homo<br>sapiens | infected patient                   | 2006                | passaged twice in C636<br>cells |
| FJ8078<br>99 | ML | Malaysi<br>a   | Homo<br>sapiens | infected patient                   | 2008                |                                 |
| FN295<br>483 | ML | Malaysi<br>a   | Homo<br>sapiens | host serum                         | mar/0<br>6          |                                 |
| FN295<br>484 | ML | Malaysi<br>a   | Homo<br>sapiens | host serum                         | mar/0<br>6          |                                 |
| FN295<br>485 | ML | Malaysi<br>a   | Homo<br>sapiens | host serum                         | 2008                |                                 |
| FN295<br>487 | ML | Malaysi<br>a   | Homo<br>sapiens | host serum                         | 2008                |                                 |
| FR687<br>340 | ML | Malaysi<br>a   | Homo<br>sapiens | human serum                        | 21-<br>Aug-<br>2008 |                                 |
| FR687<br>341 | ML | Malaysi<br>a   | Homo<br>sapiens | human serum                        | 05/no<br>v/08       |                                 |
| FR687<br>342 | ML | Malaysi<br>a   | Homo<br>sapiens | human serum                        | 10/no<br>v/08       |                                 |

|              |    |                |                        |             |                     |                         |
|--------------|----|----------------|------------------------|-------------|---------------------|-------------------------|
| FR687<br>343 | ML | Malaysi<br>a   | Homo<br>sapiens        | human serum | 12-<br>Dec-<br>2008 |                         |
| FR687<br>344 | ML | Malaysi<br>a   | Homo<br>sapiens        | human serum | 12/jan<br>/09       |                         |
| FR687<br>345 | ML | Malaysi<br>a   | Homo<br>sapiens        | human serum | 05-<br>Feb-<br>2009 |                         |
| FR687<br>346 | ML | Malaysi<br>a   | Homo<br>sapiens        | human serum | 16-<br>Feb-<br>2009 |                         |
| FR687<br>347 | ML | Malaysi<br>a   | Homo<br>sapiens        | human serum | 12-<br>Feb-<br>2009 |                         |
| FR687<br>348 | ML | Malaysi<br>a   | Homo<br>sapiens        | human serum | 03-<br>Apr-<br>2009 |                         |
| KM923<br>917 | ML | Malaysi<br>a   | Macaca<br>fascicularis |             | 09/ma<br>r/07       |                         |
| KM923<br>918 | ML | Malaysi<br>a   | Macaca<br>fascicularis |             | 09/ma<br>r/07       |                         |
| KM923<br>919 | ML | Malaysi<br>a   | Macaca<br>fascicularis |             | 09/ma<br>r/07       |                         |
| KM923<br>920 | ML | Malaysi<br>a   | Macaca<br>fascicularis |             | 09/ma<br>r/07       |                         |
| KX168<br>429 | ML | Malaysi<br>a   | Homo<br>sapiens        | serum       | 2009                |                         |
| KX262<br>997 | ML | Malaysi<br>a   | Homo<br>sapiens        |             | 2009                | passage history: C636#1 |
| LN898<br>093 | ML | Martiniq<br>ue | Homo<br>sapiens        |             | Dec-<br>2013        |                         |
| LN898<br>095 | ML | Martiniq<br>ue | Homo<br>sapiens        |             | jan/14              |                         |
| LN898<br>096 | ML | Martiniq<br>ue | Homo<br>sapiens        |             | jan/14              |                         |
| LN898<br>100 | ML | Martiniq<br>ue | Homo<br>sapiens        |             | jan/14              |                         |
| LN898<br>101 | ML | Martiniq<br>ue | Homo<br>sapiens        |             | jan/14              |                         |
| LN898<br>104 | ML | Martiniq<br>ue | Homo<br>sapiens        |             | jan/14              |                         |
| LN898<br>105 | ML | Martiniq<br>ue | Homo<br>sapiens        |             | jan/14              |                         |



|              |    |                |                            |                                          |                     |                           |
|--------------|----|----------------|----------------------------|------------------------------------------|---------------------|---------------------------|
| LN898<br>106 | ML | Martiniq<br>ue | Homo<br>sapiens            |                                          | jan/14              |                           |
| LN898<br>107 | ML | Martiniq<br>ue | Homo<br>sapiens            |                                          | jan/14              |                           |
| LN898<br>108 | ML | Martiniq<br>ue | Homo<br>sapiens            |                                          | jan/14              |                           |
| LN898<br>109 | ML | Martiniq<br>ue | Homo<br>sapiens            |                                          | jan/14              |                           |
| LN898<br>112 | ML | Martiniq<br>ue | Homo<br>sapiens            |                                          | jan/14              |                           |
| EU564<br>334 | ML | Mauritiu<br>s  | Homo<br>sapiens            | supernatant of infected<br>Vero B4 cells | 14-<br>Feb-<br>2006 | passaged in Vero B4 cells |
| FJ9591<br>03 | ML | Mauritiu<br>s  | Homo<br>sapiens            |                                          | 2006                |                           |
| KP003<br>809 | ML | Mayotte        | Homo<br>sapiens            |                                          | 2006                |                           |
| KP851<br>709 | ML | Mexico         | Homo<br>sapiens;<br>female | serum                                    | 15-<br>Oct-<br>2014 |                           |
| KP851<br>710 | ML | Mexico         | Homo<br>sapiens;<br>female | cell culture                             | 30-<br>May-<br>2014 | Passage in cell culture   |
| KT327<br>163 | ML | Mexico         | Homo<br>sapiens            | serum                                    | 2014                |                           |
| KT327<br>164 | ML | Mexico         | Homo<br>sapiens            | serum                                    | 2014                |                           |
| KT327<br>165 | ML | Mexico         | Homo<br>sapiens            | serum                                    | 2014                |                           |
| KT327<br>166 | ML | Mexico         | Homo<br>sapiens            | serum                                    | 2014                |                           |
| KT327<br>167 | ML | Mexico         | Homo<br>sapiens            | serum                                    | 2014                |                           |
| KU365<br>366 | ML | Mexico         | Homo<br>sapiens            |                                          | 09-<br>Oct-<br>2014 |                           |
| KU365<br>367 | ML | Mexico         | Homo<br>sapiens            |                                          | 07/no<br>v/14       |                           |
| KU365<br>368 | ML | Mexico         | Homo<br>sapiens            |                                          | 26/ma<br>r/14       |                           |
| KJ4516<br>22 | ML | Microne<br>sia | Homo<br>sapiens            |                                          | Oct-<br>2013        |                           |

|              |    |                       |                 |                                    |                     |                                   |
|--------------|----|-----------------------|-----------------|------------------------------------|---------------------|-----------------------------------|
| KJ4516<br>23 | ML | Microne<br>sia        | Homo<br>sapiens |                                    | Oct-<br>2013        |                                   |
| KJ6894<br>52 | ML | Microne<br>sia        |                 | Aedes aegypti mosquito<br>pool     | nov/1<br>3          |                                   |
| KJ6894<br>53 | ML | Microne<br>sia        |                 | Aedes hensilli mosquito<br>pool    | nov/1<br>3          |                                   |
| KY435<br>457 | ML | Montser<br>rat        | Homo<br>sapiens | cell culture supernatant<br>(vero) | 30-<br>Oct-<br>2014 | Passage in cell culture           |
| KY435<br>467 | ML | Montser<br>rat        | Homo<br>sapiens | cell culture supernatant<br>(vero) | 24/jul<br>/14       | Passage in cell culture           |
| KF151<br>174 | ML | Myanm<br>ar           | Homo<br>sapiens | serum                              | 13/jul<br>/09       |                                   |
| KF151<br>175 | ML | Myanm<br>ar           | Homo<br>sapiens | serum                              | 11-<br>Dec-<br>2009 |                                   |
| KF590<br>564 | ML | Myanm<br>ar           | Homo<br>sapiens | infected patient                   | 2010                |                                   |
| KF590<br>565 | ML | Myanm<br>ar           | Homo<br>sapiens | infected patient                   | 2010                |                                   |
| KF590<br>566 | ML | Myanm<br>ar           | Homo<br>sapiens | infected patient                   | 2010                |                                   |
| KF590<br>567 | ML | Myanm<br>ar           | Homo<br>sapiens | infected patient                   | 2010                |                                   |
| HE806<br>461 | ML | New-<br>Caledon<br>ia | Homo<br>sapiens | host serum                         | 28-<br>Feb-<br>2011 |                                   |
| KT192<br>707 | ML | Nicarag<br>ua         | Homo<br>sapiens |                                    | 31-<br>Oct-<br>2014 |                                   |
| KY703<br>888 | ML | Nicarag<br>ua         | Homo<br>sapiens |                                    | 15-<br>Aug-<br>2015 | passage history: not<br>passaged; |
| KY703<br>889 | ML | Nicarag<br>ua         | Homo<br>sapiens |                                    | 05-<br>Aug-<br>2015 | passage history: not<br>passaged; |
| KY703<br>890 | ML | Nicarag<br>ua         | Homo<br>sapiens |                                    | 23-<br>Sep-<br>2015 | passage history: not<br>passaged; |
| KY703<br>891 | ML | Nicarag<br>ua         | Homo<br>sapiens |                                    | 17-<br>Sep-<br>2015 | passage history: not<br>passaged; |
| KY703<br>892 | ML | Nicarag<br>ua         | Homo<br>sapiens |                                    | 26/no<br>v/15       | passage history: not<br>passaged; |

|              |    |               |                 |  |                     |                                   |
|--------------|----|---------------|-----------------|--|---------------------|-----------------------------------|
| KY703<br>893 | ML | Nicarag<br>ua | Homo<br>sapiens |  | 02-<br>Sep-<br>2015 | passage history: unknown;         |
| KY703<br>894 | ML | Nicarag<br>ua | Homo<br>sapiens |  | 09-<br>Oct-<br>2015 | passage history: not<br>passaged; |
| KY703<br>895 | ML | Nicarag<br>ua | Homo<br>sapiens |  | 26/no<br>v/15       | passage history: not<br>passaged; |
| KY703<br>896 | ML | Nicarag<br>ua | Homo<br>sapiens |  | 18-<br>Dec-<br>2014 | passage history: passaged;        |
| KY703<br>897 | ML | Nicarag<br>ua | Homo<br>sapiens |  | 16/jan<br>/15       | passage history: not<br>passaged; |
| KY703<br>898 | ML | Nicarag<br>ua | Homo<br>sapiens |  | 25-<br>Aug-<br>2015 | passage history: not<br>passaged; |
| KY703<br>899 | ML | Nicarag<br>ua | Homo<br>sapiens |  | 20-<br>Oct-<br>2015 | passage history: not<br>passaged; |
| KY703<br>900 | ML | Nicarag<br>ua | Homo<br>sapiens |  | 14-<br>Dec-<br>2015 | passage history: not<br>passaged; |
| KY703<br>901 | ML | Nicarag<br>ua | Homo<br>sapiens |  | 26/jan<br>/15       | passage history: not<br>passaged; |
| KY703<br>902 | ML | Nicarag<br>ua | Homo<br>sapiens |  | 05-<br>Sep-<br>2015 | passage history: unknown;         |
| KY703<br>903 | ML | Nicarag<br>ua | Homo<br>sapiens |  | 05-<br>Sep-<br>2015 | passage history: not<br>passaged; |
| KY703<br>904 | ML | Nicarag<br>ua | Homo<br>sapiens |  | 04-<br>Oct-<br>2014 | passage history: passaged;        |
| KY703<br>905 | ML | Nicarag<br>ua | Homo<br>sapiens |  | 17-<br>Sep-<br>2015 | passage history: not<br>passaged; |
| KY703<br>906 | ML | Nicarag<br>ua | Homo<br>sapiens |  | 08-<br>Sep-<br>2015 | passage history: not<br>passaged; |
| KY703<br>907 | ML | Nicarag<br>ua | Homo<br>sapiens |  | 15/jul<br>/15       | passage history: not<br>passaged; |
| KY703<br>908 | ML | Nicarag<br>ua | Homo<br>sapiens |  | 02-<br>Dec-<br>2014 | passage history: passaged;        |

|              |    |               |                 |  |                     |                                   |
|--------------|----|---------------|-----------------|--|---------------------|-----------------------------------|
| KY703<br>909 | ML | Nicarag<br>ua | Homo<br>sapiens |  | 28/jan<br>/15       | passage history: not<br>passaged; |
| KY703<br>910 | ML | Nicarag<br>ua | Homo<br>sapiens |  | 18-<br>Oct-<br>2015 | passage history: not<br>passaged; |
| KY703<br>911 | ML | Nicarag<br>ua | Homo<br>sapiens |  | 17-<br>Dec-<br>2015 | passage history: not<br>passaged; |
| KY703<br>912 | ML | Nicarag<br>ua | Homo<br>sapiens |  | 14-<br>Dec-<br>2015 | passage history: not<br>passaged; |
| KY703<br>913 | ML | Nicarag<br>ua | Homo<br>sapiens |  | 13-<br>Aug-<br>2015 | passage history: not<br>passaged; |
| KY703<br>914 | ML | Nicarag<br>ua | Homo<br>sapiens |  | 15-<br>Aug-<br>2015 | passage history: not<br>passaged; |
| KY703<br>915 | ML | Nicarag<br>ua | Homo<br>sapiens |  | 03-<br>Aug-<br>2015 | passage history: not<br>passaged; |
| KY703<br>916 | ML | Nicarag<br>ua | Homo<br>sapiens |  | 04-<br>Aug-<br>2015 | passage history: not<br>passaged; |
| KY703<br>917 | ML | Nicarag<br>ua | Homo<br>sapiens |  | 08/jan<br>/16       | passage history: not<br>passaged; |
| KY703<br>918 | ML | Nicarag<br>ua | Homo<br>sapiens |  | 26/jan<br>/15       | passage history: not<br>passaged; |
| KY703<br>919 | ML | Nicarag<br>ua | Homo<br>sapiens |  | 29/jan<br>/15       | passage history: not<br>passaged; |
| KY703<br>920 | ML | Nicarag<br>ua | Homo<br>sapiens |  | 16/no<br>v/15       | passage history: not<br>passaged; |
| KY703<br>921 | ML | Nicarag<br>ua | Homo<br>sapiens |  | 04/no<br>v/15       | passage history: not<br>passaged; |
| KY703<br>922 | ML | Nicarag<br>ua | Homo<br>sapiens |  | 06-<br>Sep-<br>2015 | passage history: unknown;         |
| KY703<br>923 | ML | Nicarag<br>ua | Homo<br>sapiens |  | 19-<br>Sep-<br>2015 | passage history: not<br>passaged; |
| KY703<br>924 | ML | Nicarag<br>ua | Homo<br>sapiens |  | 13-<br>Aug-<br>2015 | passage history: not<br>passaged; |

|              |    |               |                   |       |                     |                                   |
|--------------|----|---------------|-------------------|-------|---------------------|-----------------------------------|
| KY703<br>925 | ML | Nicarag<br>ua | Homo<br>sapiens   |       | 06-<br>Sep-<br>2015 | passage history: unknown;         |
| KY703<br>926 | ML | Nicarag<br>ua | Homo<br>sapiens   |       | 20-<br>Aug-<br>2015 | passage history: not<br>passaged; |
| KY703<br>927 | ML | Nicarag<br>ua | Homo<br>sapiens   |       | 15/jan<br>/15       | passage history: not<br>passaged; |
| KY703<br>928 | ML | Nicarag<br>ua | Homo<br>sapiens   |       | 30/jan<br>/15       | passage history: not<br>passaged; |
| KY703<br>929 | ML | Nicarag<br>ua | Homo<br>sapiens   |       | 02-<br>Dec-<br>2015 | passage history: not<br>passaged; |
| KY703<br>930 | ML | Nicarag<br>ua | Homo<br>sapiens   |       | 24/no<br>v/15       | passage history: not<br>passaged; |
| KY703<br>931 | ML | Nicarag<br>ua | Homo<br>sapiens   |       | 19-<br>Sep-<br>2015 | passage history: not<br>passaged; |
| KY703<br>932 | ML | Nicarag<br>ua | Homo<br>sapiens   |       | 19-<br>Aug-<br>2015 | passage history: not<br>passaged; |
| KY703<br>933 | ML | Nicarag<br>ua | Homo<br>sapiens   |       | 09-<br>Oct-<br>2015 | passage history: not<br>passaged; |
| KY703<br>934 | ML | Nicarag<br>ua | Homo<br>sapiens   |       | 27-<br>Oct-<br>2015 | passage history: not<br>passaged; |
| KY703<br>935 | ML | Nicarag<br>ua | Homo<br>sapiens   |       | 02-<br>Dec-<br>2015 | passage history: not<br>passaged; |
| KY703<br>936 | ML | Nicarag<br>ua | Homo<br>sapiens   |       | 07-<br>Oct-<br>2015 | passage history: not<br>passaged; |
| KY703<br>937 | ML | Nicarag<br>ua | Homo<br>sapiens   |       | 15-<br>Oct-<br>2015 | passage history: not<br>passaged; |
| HM045<br>786 | ML | Nigeria       | Homo<br>sapiens   |       | 07/jul<br>/64       |                                   |
| HM045<br>807 | ML | Nigeria       | sentinel<br>mouse | brain | 13-<br>Apr-<br>1965 |                                   |
| KR559<br>486 | ML | Panama        |                   |       | nov/1<br>4          |                                   |

|              |    |             |              |                                 |             |                         |
|--------------|----|-------------|--------------|---------------------------------|-------------|-------------------------|
| AB860<br>301 | ML | Philippines | Homo sapiens | patient serum                   | 2013        |                         |
| HM045<br>790 | ML | Philippines | Homo sapiens |                                 | 17/jul/85   |                         |
| HM045<br>800 | ML | Philippines | Homo sapiens |                                 | 1985        |                         |
| KT308<br>159 | ML | Philippines | Homo sapiens | serum                           | 2012        |                         |
| KT308<br>160 | ML | Philippines | Homo sapiens | serum                           | 2012        |                         |
| KT308<br>161 | ML | Philippines | Homo sapiens | serum                           | 2012        |                         |
| KT308<br>162 | ML | Philippines | Homo sapiens | serum                           | 2012        |                         |
| KT308<br>163 | ML | Philippines | Homo sapiens | serum                           | 2012        |                         |
| KR264<br>949 | ML | Puerto-Rico | Homo sapiens |                                 | 15/jul/14   |                         |
| KR264<br>950 | ML | Puerto-Rico | Homo sapiens |                                 | 16/jul/14   |                         |
| KR264<br>951 | ML | Puerto-Rico | Homo sapiens |                                 | 14-Aug-2014 |                         |
| KR559<br>470 | ML | Puerto-Rico |              |                                 | nov/14      |                         |
| KR559<br>474 | ML | Puerto-Rico |              |                                 | Sep-2014    |                         |
| KR559<br>483 | ML | Puerto-Rico |              |                                 | Oct-2014    |                         |
| KR559<br>495 | ML | Puerto-Rico |              |                                 | jul/14      |                         |
| KF872<br>195 | ML | Russia      | Homo sapiens | blood                           | 24-Sep-2013 |                         |
| KY435<br>481 | ML | Saint       | Homo sapiens | cell culture supernatant (vero) | 22-Apr-2014 | Passage in cell culture |
| KY435<br>482 | ML | Saint       | Homo sapiens | cell culture supernatant (vero) | 11/mar/14   | Passage in cell culture |
| KR559<br>492 | ML | Saint Lucia |              |                                 | Aug-2014    |                         |

|              |          |               |                     |                                 |             |                                                        |
|--------------|----------|---------------|---------------------|---------------------------------|-------------|--------------------------------------------------------|
| KY435<br>474 | ML       | Saint Lucia   | Homo sapiens        | cell culture supernatant (vero) | 19-May-2014 | Passage in cell culture                                |
| KX262<br>991 | ML       | Saint Martin  | Homo sapiens        |                                 | 2003        | passage history: P2J3, Vero 2;                         |
| KY435<br>473 | ML       | Saint Vincent | Homo sapiens        | cell culture supernatant (vero) | 22-May-2014 | Passage in cell culture                                |
| KY435<br>475 | ML       | Saint Vincent | Homo sapiens        | cell culture supernatant (vero) | 22-May-2014 | Passage in cell culture                                |
| HM045<br>785 | ML       | Senegal       | Aedes aegypti       |                                 | nov/66      |                                                        |
| HM045<br>798 | ML       | Senegal       | Homo sapiens        |                                 | nov/66      |                                                        |
| HM045<br>815 | ML       | Senegal       | Aedes luteocephalus |                                 | Feb-1979    |                                                        |
| HM045<br>816 | ML       | Senegal       | Homo sapiens        |                                 | 23/nov/66   |                                                        |
| HM045<br>817 | ML       | Senegal       | Homo sapiens        |                                 | nov/05      |                                                        |
| HM045<br>819 | ML       | Senegal       | Aedes dalzieli      |                                 | Feb-1993    |                                                        |
| HM045<br>821 | ML/Bayes | Senegal       | Chiroptera          |                                 | 20/mar/63   |                                                        |
| KX262<br>986 | ML       | Senegal       | Aedes furcifer      |                                 | 1983        | passage history: AP61#1, Vero 2;                       |
| KX262<br>995 | ML       | Senegal       | Aedes furcifer      |                                 | 10/jul/83   | passage history: AP61#1, Vero1; genotype: West African |
| FJ4454<br>30 | ML       | Singapore     | Homo sapiens        | serum                           | jul/08      |                                                        |
| FJ4454<br>31 | ML       | Singapore     | Homo sapiens        | serum                           | jul/08      |                                                        |
| FJ4454<br>32 | ML       | Singapore     | Homo sapiens        | serum                           | jul/08      |                                                        |
| FJ4454<br>33 | ML       | Singapore     | Homo sapiens        | serum                           | Aug-2008    |                                                        |
| FJ4454<br>43 | ML       | Singapore     | Homo sapiens        | serum                           | Aug-2008    |                                                        |

|              |                  |                  |                   |                  |              |                           |
|--------------|------------------|------------------|-------------------|------------------|--------------|---------------------------|
| FJ4454<br>45 | ML               | Singapo<br>re    | Homo<br>sapiens   | serum            | Aug-<br>2008 |                           |
| FJ4454<br>63 | ML               | Singapo<br>re    | Homo<br>sapiens   | serum            | jul/08       |                           |
| FJ4454<br>84 | ML               | Singapo<br>re    | Homo<br>sapiens   | serum            | May-<br>2008 |                           |
| FJ4455<br>02 | ML               | Singapo<br>re    | Homo<br>sapiens   | serum            | Aug-<br>2008 |                           |
| FJ4455<br>10 | ML               | Singapo<br>re    | Homo<br>sapiens   | serum            | jan/08       |                           |
| FJ4455<br>11 | ML               | Singapo<br>re    | Homo<br>sapiens   | serum            | jan/08       |                           |
| FJ8078<br>96 | ML               | Singapo<br>re    | Homo<br>sapiens   | infected patient | 2006         |                           |
| HM045<br>792 | ML<br>/Ba<br>yes | South-<br>Africa | Homo<br>sapiens   |                  | Apr-<br>1956 |                           |
| HM045<br>795 | ML<br>/Ba<br>yes | South-<br>Africa | Homo<br>sapiens   |                  | 1976         |                           |
| HM045<br>805 | ML<br>/Ba<br>yes | South-<br>Africa | Aedes<br>furcifer |                  | 1976         |                           |
| AB455<br>493 | ML               | Sri-<br>Lanka    | Homo<br>sapiens   | infected patient | 2006-<br>12  | passaged in Vero B4 cells |
| AB455<br>494 | ML               | Sri-<br>Lanka    | Homo<br>sapiens   | infected patient | 2006-<br>12  | passaged in Vero B4 cells |
| FJ4454<br>26 | ML               | Sri-<br>Lanka    | Homo<br>sapiens   | serum            | Apr-<br>2008 |                           |
| FJ4454<br>27 | ML               | Sri-<br>Lanka    | Homo<br>sapiens   | serum            | jul/07       |                           |
| FJ4454<br>28 | ML               | Sri-<br>Lanka    | Homo<br>sapiens   | serum            | May-<br>2007 |                           |
| FJ5136<br>28 | ML               | Sri-<br>Lanka    | Homo<br>sapiens   | serum            | mar/0<br>8   |                           |
| FJ5136<br>29 | ML               | Sri-<br>Lanka    | Homo<br>sapiens   | serum            | mar/0<br>8   |                           |
| FJ5136<br>32 | ML               | Sri-<br>Lanka    | Homo<br>sapiens   | serum            | mar/0<br>8   |                           |
| FJ5136<br>35 | ML               | Sri-<br>Lanka    | Homo<br>sapiens   | serum            | mar/0<br>8   |                           |



|              |          |           |              |                                 |             |                         |
|--------------|----------|-----------|--------------|---------------------------------|-------------|-------------------------|
| FJ5136<br>37 | ML       | Sri-Lanka | Homo sapiens | serum                           | mar/08      |                         |
| FJ5136<br>45 | ML       | Sri-Lanka | Homo sapiens | serum                           | Apr-2008    |                         |
| FJ5136<br>54 | ML       | Sri-Lanka | Homo sapiens | serum                           | Apr-2008    |                         |
| FJ5136<br>57 | ML       | Sri-Lanka | Homo sapiens | serum                           | Apr-2008    |                         |
| FJ5136<br>73 | ML       | Sri-Lanka | Homo sapiens | serum                           | Apr-2008    |                         |
| FJ5136<br>75 | ML       | Sri-Lanka | Homo sapiens | serum                           | Apr-2008    |                         |
| FJ5136<br>79 | ML       | Sri-Lanka | Homo sapiens | serum                           | Apr-2008    |                         |
| GU013<br>528 | ML       | Sri-Lanka | Homo sapiens | serum                           | mar/08      |                         |
| GU013<br>529 | ML       | Sri-Lanka | Homo sapiens | serum                           | mar/08      |                         |
| GU013<br>530 | ML       | Sri-Lanka | Homo sapiens | serum                           | Apr-2008    |                         |
| GU189<br>061 | ML       | Sri-Lanka | Homo sapiens |                                 | 2006        |                         |
| HM045<br>799 | ML       | Sri-Lanka | Homo sapiens |                                 | 2007        |                         |
| HM045<br>801 | ML       | Sri-Lanka | Homo sapiens |                                 | 2007        |                         |
| KR559<br>497 | ML       | St. Barts |              |                                 | jun/14      |                         |
| KY435<br>456 | ML       | Suriname  | Homo sapiens | cell culture supernatant (vero) | 17-Aug-2014 | Passage in cell culture |
| KY435<br>463 | ML       | Suriname  | Homo sapiens | cell culture supernatant (vero) | 02-Aug-2014 | Passage in cell culture |
| HM045<br>811 | ML/Bayes | Tanzania  | Homo sapiens |                                 | 22-Feb-1953 |                         |
| GQ905<br>863 | ML       | Thailand  | Homo sapiens |                                 | 25-May-2009 |                         |
| GU301<br>779 | ML       | Thailand  | Homo sapiens | serum                           | 04-Sep-2009 |                         |

|          |    |          |                  |                                     |             |                         |
|----------|----|----------|------------------|-------------------------------------|-------------|-------------------------|
| GU301780 | ML | Thailand | Homo sapiens     | serum                               | 21-Oct-2008 |                         |
| GU301781 | ML | Thailand | Homo sapiens     | culture                             | 27/jul/09   | Passage in cell culture |
| GU908223 | ML | Thailand | Aedes albopictus | supernatant                         | 14-Aug-2009 | Passage in cell culture |
| HM045787 | ML | Thailand | Homo sapiens     |                                     | 1995        |                         |
| HM045789 | ML | Thailand | Homo sapiens     |                                     | 1988        |                         |
| HM045796 | ML | Thailand | Homo sapiens     |                                     | 1995        |                         |
| HM045808 | ML | Thailand | Homo sapiens     |                                     | 1978        |                         |
| HM045810 | ML | Thailand | Homo sapiens     |                                     | 1958        |                         |
| HM045814 | ML | Thailand | Homo sapiens     |                                     | 1975        |                         |
| KJ579184 | ML | Thailand | Homo sapiens     | serum sample from suspected patient | 14-Oct-2013 |                         |
| KJ579185 | ML | Thailand | Homo sapiens     | serum sample from suspected patient | 14-Oct-2013 |                         |
| KJ579186 | ML | Thailand | Homo sapiens     | serum sample from suspected patient | 14-Oct-2013 |                         |
| KJ579187 | ML | Thailand | Homo sapiens     | serum sample from suspected patient | 14-Oct-2013 |                         |
| KJ796847 | ML | Thailand |                  | serum                               | 05/mar/09   |                         |
| KJ796848 | ML | Thailand |                  | age 57 female serum                 | 06/nov/08   |                         |
| KJ796849 | ML | Thailand |                  | age 28 male serum                   | 23-Dec-2008 |                         |
| KJ796850 | ML | Thailand |                  | age 48 female serum                 | 16-Sep-2009 |                         |

|              |    |          |              |                     |                     |                                                |
|--------------|----|----------|--------------|---------------------|---------------------|------------------------------------------------|
| KJ7968<br>51 | ML | Thailand |              | age 60 female serum | 01-<br>Dec-<br>2008 |                                                |
| KJ7968<br>52 | ML | Thailand |              | age 56 female serum | 12-<br>Feb-<br>2009 |                                                |
| KP164<br>869 | ML | Thailand |              |                     | 2009                |                                                |
| KX009<br>167 | ML | Thailand | Homo sapiens | serum               | 2013                |                                                |
| KX009<br>168 | ML | Thailand | Homo sapiens | serum               | 2013                |                                                |
| KX009<br>169 | ML | Thailand | Homo sapiens | serum               | 2013                |                                                |
| KX009<br>170 | ML | Thailand | Homo sapiens | serum               | 2013                |                                                |
| KX009<br>171 | ML | Thailand | Homo sapiens | serum               | 2013                |                                                |
| KX262<br>987 | ML | Thailand | Homo sapiens |                     | 1996                | passage history: LLC-<br>MK#2, Vero 1          |
| KX262<br>988 | ML | Thailand | Homo sapiens |                     | 1988                | passage history: LLC-<br>MK2#2,C636#1, Vero 1; |
| KR046<br>227 | ML | Trinidad | Homo sapiens | serum               | 30-<br>Aug-<br>2014 |                                                |
| KR046<br>228 | ML | Trinidad | Homo sapiens | serum               | 11-<br>Sep-<br>2014 |                                                |
| KR046<br>229 | ML | Trinidad | Homo sapiens | serum               | 17-<br>Sep-<br>2014 |                                                |
| KR046<br>230 | ML | Trinidad | Homo sapiens | serum               | 18-<br>Sep-<br>2014 |                                                |
| KR046<br>231 | ML | Trinidad | Homo sapiens | serum               | 09/no<br>v/14       |                                                |
| KR046<br>232 | ML | Trinidad | Homo sapiens | serum               | 20-<br>Sep-<br>2014 |                                                |
| KR046<br>233 | ML | Trinidad | Homo sapiens | serum               | 20-<br>Sep-<br>2014 |                                                |

|              |          |                  |              |                                          |             |                          |
|--------------|----------|------------------|--------------|------------------------------------------|-------------|--------------------------|
| KR046<br>234 | ML       | Trinidad         | Homo sapiens | serum                                    | 12-Sep-2014 |                          |
| KU365<br>369 | ML       | Trinidad         | Homo sapiens |                                          | 2014        |                          |
| KY435<br>454 | ML       | Trinidad         | Homo sapiens | cell culture supernatant (vero)          | nov/11      | Passage in cell culture  |
| KY435<br>465 | ML       | Trinidad         | Homo sapiens | cell culture supernatant (vero)          | 17-Aug-2014 | Passage in cell culture  |
| KY435<br>471 | ML       | Turks and Caicos | Homo sapiens | cell culture supernatant (vero)          | 11/jun/14   | Passage in cell culture  |
| KY435<br>476 | ML       | Turks and Caicos | Homo sapiens | cell culture supernatant (vero)          | 05/jun/14   | Passage in cell culture  |
| HM045<br>812 | ML/Bayes | Uganda           | Homo sapiens |                                          | 1982        |                          |
| HM045<br>794 | ML       | USA              | Homo sapiens |                                          | 2006        |                          |
| KJ9410<br>50 | ML       | USA              | Homo sapiens | cell culture supernatant, Vero passage 4 | 2006        | Passage in cell culture  |
| KY575<br>565 | ML       | USA              | Homo sapiens |                                          | 2014        | passage history: V1;     |
| KY575<br>566 | ML       | USA              | Homo sapiens |                                          | 2014        | passage history: V1;     |
| KY575<br>567 | ML       | USA              | Homo sapiens |                                          | 2006        | passage history: P?V2    |
| KY575<br>568 | ML       | USA              | Homo sapiens |                                          | 2006        | passage history: P?V2    |
| KY575<br>569 | ML       | USA              | Homo sapiens |                                          | 2014        | passage history: V1;     |
| KY575<br>570 | ML       | USA              | Homo sapiens |                                          | 2008        | passage history: V1      |
| KY575<br>571 | ML       | USA              | Homo sapiens |                                          | 2006        | passage history: V2      |
| KY575<br>572 | ML       | USA              | Homo sapiens |                                          | 2014        | passage history: V1;     |
| KY575<br>573 | ML       | USA              | Homo sapiens |                                          | 2014        | passage history: V1;     |
| KY575<br>574 | ML       | USA              | Homo sapiens |                                          | 1995        | passage history: P?SM1V3 |

|              |    |     |              |  |             |                          |
|--------------|----|-----|--------------|--|-------------|--------------------------|
| KY680<br>347 | ML | USA | Homo sapiens |  | 13-May-2014 | passage history: VERO 0; |
| KY680<br>348 | ML | USA | Homo sapiens |  | 05-Sep-2014 |                          |
| KY680<br>349 | ML | USA | Homo sapiens |  | 02/jul/14   | passage history: VERO 0; |
| KY680<br>350 | ML | USA | Homo sapiens |  | 10-Dec-2014 |                          |
| KY680<br>351 | ML | USA | Homo sapiens |  | 24/jun/14   | passage history: VERO 0; |
| KY680<br>352 | ML | USA | Homo sapiens |  | 15-May-2014 |                          |
| KY680<br>353 | ML | USA | Homo sapiens |  | 25-Aug-2014 |                          |
| KY680<br>354 | ML | USA | Homo sapiens |  | 08-May-2014 | passage history: VERO 0; |
| KY680<br>355 | ML | USA | Homo sapiens |  | 22/jul/14   |                          |
| KY680<br>356 | ML | USA | Homo sapiens |  | 21/jul/14   | passage history: VERO 0; |
| KY680<br>357 | ML | USA | Homo sapiens |  | 09-Aug-2014 | passage history: VERO 0; |
| KY680<br>358 | ML | USA | Homo sapiens |  | 08-Aug-2014 | passage history: VERO 0; |
| KY680<br>359 | ML | USA | Homo sapiens |  | 04/jul/14   | passage history: VERO 0; |
| KY680<br>360 | ML | USA | Homo sapiens |  | 05-Aug-2014 |                          |
| KY680<br>361 | ML | USA | Homo sapiens |  | 26-May-2014 |                          |
| KY680<br>362 | ML | USA | Homo sapiens |  | 26/jul/14   | passage history: VERO 0; |
| KY680<br>363 | ML | USA | Homo sapiens |  | 15/jun/14   | passage history: VERO 0; |

|              |    |     |              |  |             |                          |
|--------------|----|-----|--------------|--|-------------|--------------------------|
| KY680<br>364 | ML | USA | Homo sapiens |  | 15-May-2014 |                          |
| KY680<br>365 | ML | USA | Homo sapiens |  | 18-Sep-2014 |                          |
| KY680<br>366 | ML | USA | Homo sapiens |  | 24/jul/15   |                          |
| KY680<br>367 | ML | USA | Homo sapiens |  | 09/jun/14   | passage history: VERO 0; |
| KY680<br>368 | ML | USA | Homo sapiens |  | 01-Dec-2014 |                          |
| KY680<br>369 | ML | USA | Homo sapiens |  | 24-May-2014 | passage history: VERO 0; |
| KY680<br>370 | ML | USA | Homo sapiens |  | 03-Oct-2014 |                          |
| KY680<br>371 | ML | USA | Homo sapiens |  | 20-Aug-2014 | passage history: VERO 0; |
| KY680<br>372 | ML | USA | Homo sapiens |  | 04/jun/14   | passage history: VERO 0; |
| KY680<br>373 | ML | USA | Homo sapiens |  | 22-Oct-2014 |                          |
| KY680<br>374 | ML | USA | Homo sapiens |  | 06-Dec-2014 |                          |
| KY680<br>375 | ML | USA | Homo sapiens |  | 04/jun/14   | passage history: VERO 0; |
| KY680<br>376 | ML | USA | Homo sapiens |  | 08-Oct-2014 |                          |
| KY680<br>377 | ML | USA | Homo sapiens |  | 16-Aug-2014 |                          |
| KY680<br>378 | ML | USA | Homo sapiens |  | 19-Oct-2014 |                          |
| KY680<br>379 | ML | USA | Homo sapiens |  | 16-Sep-2014 |                          |

|              |    |     |              |  |                     |                          |
|--------------|----|-----|--------------|--|---------------------|--------------------------|
| KY680<br>380 | ML | USA | Homo sapiens |  | 13-<br>Oct-<br>2014 |                          |
| KY680<br>381 | ML | USA | Homo sapiens |  | 21-<br>Oct-<br>2014 |                          |
| KY680<br>382 | ML | USA | Homo sapiens |  | 04/jun<br>/14       |                          |
| KY680<br>383 | ML | USA | Homo sapiens |  | 20-<br>Aug-<br>2014 |                          |
| KY680<br>384 | ML | USA | Homo sapiens |  | 25/jun<br>/14       | passage history: VERO 0; |
| KY680<br>385 | ML | USA | Homo sapiens |  | 25/no<br>v/14       |                          |
| KY680<br>386 | ML | USA | Homo sapiens |  | 24-<br>Sep-<br>2014 |                          |
| KY680<br>387 | ML | USA | Homo sapiens |  | 14-<br>Oct-<br>2014 |                          |
| KY680<br>388 | ML | USA | Homo sapiens |  | 02-<br>Oct-<br>2014 |                          |
| KY680<br>389 | ML | USA | Homo sapiens |  | 14/jul<br>/15       |                          |
| KY680<br>390 | ML | USA | Homo sapiens |  | 07-<br>May-<br>2014 | passage history: VERO 0; |
| KY680<br>391 | ML | USA | Homo sapiens |  | 24-<br>Oct-<br>2014 |                          |
| KY680<br>392 | ML | USA | Homo sapiens |  | 19-<br>Oct-<br>2014 |                          |
| KY680<br>393 | ML | USA | Homo sapiens |  | 17-<br>Sep-<br>2014 |                          |
| KY680<br>394 | ML | USA | Homo sapiens |  | 05-<br>Oct-<br>2014 |                          |
| KY680<br>395 | ML | USA | Homo sapiens |  | 21/jul<br>/14       | passage history: VERO 0; |

|              |    |     |                 |  |                     |                          |
|--------------|----|-----|-----------------|--|---------------------|--------------------------|
| KY680<br>396 | ML | USA | Homo<br>sapiens |  | 02-<br>Sep-<br>2014 |                          |
| KY680<br>397 | ML | USA | Homo<br>sapiens |  | 23-<br>May-<br>2014 | passage history: VERO 0; |
| KY680<br>398 | ML | USA | Homo<br>sapiens |  | 05-<br>Aug-<br>2014 |                          |
| KY680<br>399 | ML | USA | Homo<br>sapiens |  | 05-<br>Sep-<br>2014 |                          |
| KY680<br>400 | ML | USA | Homo<br>sapiens |  | 15/jul<br>/14       | passage history: VERO 0; |
| KY680<br>401 | ML | USA | Homo<br>sapiens |  | 22-<br>Sep-<br>2014 |                          |
| KY680<br>402 | ML | USA | Homo<br>sapiens |  | 27/jul<br>/14       | passage history: VERO 0; |
| KY680<br>403 | ML | USA | Homo<br>sapiens |  | 14/jun<br>/14       | passage history: VERO 0; |
| KY680<br>404 | ML | USA | Homo<br>sapiens |  | 17-<br>Sep-<br>2014 |                          |
| KY680<br>405 | ML | USA | Homo<br>sapiens |  | 18/jun<br>/14       | passage history: VERO 0; |
| KY680<br>406 | ML | USA | Homo<br>sapiens |  | 08-<br>Aug-<br>2014 | passage history: VERO 0; |
| KY680<br>407 | ML | USA | Homo<br>sapiens |  | 20/no<br>v/14       |                          |
| KY680<br>408 | ML | USA | Homo<br>sapiens |  | 26/jun<br>/14       | passage history: VERO 0; |
| KY680<br>409 | ML | USA | Homo<br>sapiens |  | 21-<br>Oct-<br>2014 |                          |
| KY680<br>410 | ML | USA | Homo<br>sapiens |  | 22-<br>Aug-<br>2014 | passage history: VERO 0; |
| KY680<br>411 | ML | USA | Homo<br>sapiens |  | 04-<br>Sep-<br>2014 |                          |



|              |    |                    |                 |  |                     |                         |
|--------------|----|--------------------|-----------------|--|---------------------|-------------------------|
| KY680<br>412 | ML | USA                | Homo<br>sapiens |  | 28-<br>Aug-<br>2014 |                         |
| KY680<br>413 | ML | USA                | Homo<br>sapiens |  | 17-<br>Sep-<br>2014 |                         |
| KY680<br>414 | ML | USA                | Homo<br>sapiens |  | 13-<br>Sep-<br>2014 |                         |
| MF001<br>507 | ML | USA                | Homo<br>sapiens |  | 2015                | passaged 1 time in C636 |
| MF001<br>508 | ML | USA                | Homo<br>sapiens |  | 2015                | passaged 1 time in C636 |
| MF001<br>509 | ML | USA                | Homo<br>sapiens |  | 2015                | passaged 1 time in C636 |
| MF001<br>510 | ML | USA                | Homo<br>sapiens |  | 2015                | passaged 1 time in C636 |
| MF001<br>511 | ML | USA                | Homo<br>sapiens |  | 2015                | passaged 1 time in C636 |
| MF001<br>512 | ML | USA                | Homo<br>sapiens |  | 2015                | passaged 1 time in C636 |
| MF001<br>513 | ML | USA                | Homo<br>sapiens |  | 2015                | passaged 1 time in C636 |
| MF001<br>514 | ML | USA                | Homo<br>sapiens |  | 2015                | passaged 1 time in C636 |
| MF001<br>515 | ML | USA                | Homo<br>sapiens |  | 2015                | passaged 1 time in C636 |
| MF001<br>516 | ML | USA                | Homo<br>sapiens |  | 2015                | passaged 1 time in C636 |
| MF001<br>517 | ML | USA                | Homo<br>sapiens |  | 2015                | passaged 1 time in C636 |
| MF001<br>518 | ML | USA                | Homo<br>sapiens |  | 2015                | passaged 1 time in C636 |
| MF001<br>519 | ML | USA                | Homo<br>sapiens |  | 2015                | passaged 1 time in C636 |
| KU365<br>374 | ML | Venezue<br>la      | Homo<br>sapiens |  | 17-<br>Dec-<br>2014 |                         |
| KR559<br>480 | ML | Virgin-<br>Islands |                 |  | Sep-<br>2014        |                         |
| KR559<br>482 | ML | Virgin-<br>Islands |                 |  | Aug-<br>2014        |                         |

|              |    |                    |                          |  |               |  |
|--------------|----|--------------------|--------------------------|--|---------------|--|
| KR559<br>485 | ML | Virgin-<br>Islands |                          |  | Oct-<br>2014  |  |
| KR559<br>494 | ML | Virgin-<br>Islands |                          |  | jul/14        |  |
| KC614<br>648 | ML | Yemen              | <i>Aedes<br/>aegypti</i> |  | 25/jan<br>/11 |  |

ML: Maximum-likelihood; Bayes: Bayesian phylogeographic; USA: United States of America; CAR: Central African Republic. Empty spaces mean that these information are not public available.

**Table S4 - Socio-Demographical data from Patients tested by RT-PCR**

| <b>Year</b>                                                            | <b>2016</b> | <b>2017</b> |
|------------------------------------------------------------------------|-------------|-------------|
| <b><i>Number of individual tested by RT-PCR (n)</i></b>                | 827         | 999         |
| <b><i>Number of individual with detectable viral loads (n)</i></b>     | 233         | 189         |
| <b><i>Detectable molecular diagnosis (%)</i></b>                       |             |             |
| CHIKV                                                                  | 72          | 37          |
| DENV-4                                                                 | 12          | 17          |
| ZIKV                                                                   | 16          | 47          |
| <b><i>Gender (%)</i></b>                                               |             |             |
| Female                                                                 | 58          | 57          |
| <b><i>Age [median years-old (IQR)]</i></b>                             | 34 (23-45)  | 30 (21-45)  |
| <b><i>Rio de Janeiro's subregion (% , Figure S3 for reference)</i></b> |             |             |
| 1.0                                                                    | 34          | 8           |
| 2.1                                                                    | 8           | 12          |
| 2.2                                                                    | 5           | 7           |
| 3.1                                                                    | 2           | 4           |
| 3.2                                                                    | 13          | 14          |
| 3.3                                                                    | 18          | 18          |
| 4.0                                                                    | 10          | 13          |
| 5.1                                                                    | 4           | 8           |
| 5.2                                                                    | 3           | 14          |
| 5.3                                                                    | 3           | 2           |

**Table S5.** Best fit spatial, molecular clock and demographic models for the ECSA Bayesian phylogeographic analysis.

| Spatial | Clock  | Demographic | PS        | SS        | Spatial   |             |              | Clock              |             |              | Demographic      |              |              |
|---------|--------|-------------|-----------|-----------|-----------|-------------|--------------|--------------------|-------------|--------------|------------------|--------------|--------------|
|         |        |             |           |           | Models    | PS BF       | SS BF        | Models             | PS BF       | SS BF        | Models           | PS BF        | SS BF        |
| Sym     | Strict | Skygrid     | -23174,82 | -23174,77 | Sym/Assym | -3,46       | 14,47        | <u>Strict/UCLN</u> | -6,14       | -6,24        | -                | -            | -            |
|         |        | Skyline     | -23152,65 | -23121,70 |           | <b>9,93</b> | <b>40,96</b> |                    | <b>8,33</b> | <b>39,45</b> | <u>Skyl/Skyg</u> | <b>22,17</b> | <b>53,07</b> |
|         | UCLN   | Skygrid     | -23168,68 | -23168,53 |           | 0,42        | 0,46         | -                  | -           | -            | -                | -            | -            |
|         |        | Skyline     | -23160,98 | -23161,15 |           | 2,15        | 2,37         |                    | -           | -            | -                | Skyl/Skyg    | 7,70         |
| Assym   | Strict | Skygrid     | -23171,36 | -23171,37 | -         | -           | -            | Strict/UCLN        | -2,26       | -2,39        | -                | -            | -            |
|         |        | Skyline     | -23162,58 | -23162,67 | -         | -           | -            |                    | 0,55        | 0,85         | Skyl/Skyg        | 8,78         | 8,71         |
|         | UCLN   | Skygrid     | -23169,10 | -23168,99 | -         | -           | -            | -                  | -           | -            | -                | -            | -            |
|         |        | Skyline     | -23163,13 | -23163,52 | -         | -           | -            |                    | -           | -            | Skyl/Skyg        | 5,97         | 5,47         |

Log marginal likelihood (ML) estimates for the phylogeographic models [symmetric (Sym) and asymmetric (Assym)], molecular-clock models [strict and uncorrelated log-normal (UCLN)], and non-parametric demographic models [Skygrid (Skyg) and Skyline (Skyl)] obtained using the path sampling (PS) and stepping-stone sampling (SS) methods. The Log Bayes factor (BF) is the difference of the Log ML between of alternative (H1) and null (H0) models (H1/H0). Log positive BF values indicates that model H1 is more strongly supported by the data than model H0, while negative values indicate that BF is in favor of the model H0. Each model was systematically compared, and higher BF values were highlighted in bold while the best fit model was underlined.

**Table S6 - Polymorphisms in the CHIKV genome**

| Mature peptide                                             | Polymorphism Ty                    | Product              | Nt Start              | Nt Stop | CDS Type                      | CDS Positio           | CDS Codon Num         | Protein position    | Codon pos         | Change                    | Polymorphism Ty                    | Codon Chang                   | Protein Effect               | Amino Acid Chang          | Variant Sequences                             |
|------------------------------------------------------------|------------------------------------|----------------------|-----------------------|---------|-------------------------------|-----------------------|-----------------------|---------------------|-------------------|---------------------------|------------------------------------|-------------------------------|------------------------------|---------------------------|-----------------------------------------------|
| <b>Nonstructural protein nsP1 peptide</b>                  |                                    |                      | 1                     | 1.605   |                               |                       | 1                     | 1                   |                   |                           |                                    |                               |                              |                           |                                               |
|                                                            | SNP (transition)                   | nsP1                 | 189                   |         | nonstructural                 | 189                   | 63                    | 63                  | 3                 | T -> C                    | SNP (transition)                   | GAT -> GAC                    | None                         |                           | ECSA BR ROOT                                  |
|                                                            | <a href="#">SNP (transition)</a>   | <a href="#">nsP1</a> | <a href="#">267</a>   |         | <a href="#">nonstructural</a> | <a href="#">267</a>   | <a href="#">89</a>    | <a href="#">89</a>  | <a href="#">3</a> | <a href="#">T -&gt; C</a> | <a href="#">SNP (transition)</a>   | <a href="#">GAT -&gt; GAC</a> | <a href="#">None</a>         |                           | <a href="#">ECSA AL NODE</a>                  |
|                                                            | SNP (transition)                   | nsP1                 | 309                   |         | nonstructural                 | 309                   | 103                   | 103                 | 3                 | C -> T                    | SNP (transition)                   | GCC -> GCT                    | None                         |                           | ECSA BR ROOT                                  |
|                                                            | SNP (transition)                   | nsP1                 | 405                   |         | nonstructural                 | 405                   | 135                   | 135                 | 3                 | A -> G                    | SNP (transition)                   | TTA -> TTG                    | None                         |                           | ECSA BR ROOT                                  |
|                                                            | SNP (transition)                   | nsP1                 | 603                   |         | nonstructural                 | 603                   | 201                   | 201                 | 3                 | T -> C                    | SNP (transition)                   | GAT -> GAC                    | None                         |                           | ECSA BR ROOT                                  |
|                                                            | SNP (transition)                   | nsP1                 | 669                   |         | nonstructural                 | 669                   | 223                   | 223                 | 3                 | C -> T                    | SNP (transition)                   | GGC -> GGT                    | None                         |                           | ECSA BR ROOT                                  |
|                                                            | SNP (transition)                   | nsP1                 | 708                   |         | nonstructural                 | 708                   | 236                   | 236                 | 3                 | C -> T                    | SNP (transition)                   | TGC -> TGT                    | None                         |                           | ECSA BR ROOT                                  |
|                                                            | SNP (transition)                   | nsP1                 | 945                   |         | nonstructural                 | 945                   | 315                   | 315                 | 3                 | T -> C                    | SNP (transition)                   | TGT -> TGC                    | None                         |                           | ECSA BR ROOT                                  |
|                                                            | SNP (transition)                   | nsP1                 | 1.389                 |         | nonstructural                 | 1.389                 | 463                   | 463                 | 3                 | T -> C                    | SNP (transition)                   | CCT -> CCC                    | None                         |                           | ECSA BR ROOT                                  |
|                                                            | SNP (transition)                   | nsP1                 | 1.449                 |         | nonstructural                 | 1.449                 | 483                   | 483                 | 3                 | C -> T                    | SNP (transition)                   | TAC -> TAT                    | None                         |                           | ECSA BR ROOT                                  |
| <b>Non-structural protein nsP2 peptide; NTPase peptide</b> |                                    |                      | 1.606                 | 3.999   |                               |                       | 536                   |                     |                   |                           |                                    |                               |                              |                           |                                               |
|                                                            | SNP (transversion)                 | nsP2                 | 1.623                 |         | nonstructural                 | 1.623                 | 541                   | 6                   | 3                 | G -> T                    | SNP (transversion)                 | CCG -> CCT                    | None                         |                           | ECSA BR ROOT                                  |
|                                                            | SNP (transition)                   | nsP2                 | 1.785                 |         | nonstructural                 | 1.785                 | 595                   | 60                  | 3                 | T -> C                    | SNP (transition)                   | TAT -> TAC                    | None                         |                           | ECSA BR ROOT                                  |
|                                                            | SNP (transition)                   | nsP2                 | 1.920                 |         | nonstructural                 | 1.920                 | 640                   | 105                 | 3                 | T -> C                    | SNP (transition)                   | CAT -> CAC                    | None                         |                           | ECSA BR ROOT                                  |
|                                                            | SNP (transition)                   | nsP2                 | 2.169                 |         | nonstructural                 | 2.169                 | 723                   | 188                 | 3                 | G -> A                    | SNP (transition)                   | CCG -> CCA                    | None                         |                           | ECSA BR ROOT                                  |
|                                                            | SNP (transition)                   | nsP2                 | 2.337                 |         | nonstructural                 | 2.337                 | 779                   | 244                 | 3                 | A -> G                    | SNP (transition)                   | AGA -> AGG                    | None                         |                           | ECSA BR ROOT                                  |
|                                                            | SNP (transition)                   | nsP2                 | 2.436                 |         | nonstructural                 | 2.436                 | 812                   | 277                 | 3                 | T -> C                    | SNP (transition)                   | CTT -> CTC                    | None                         |                           | ECSA BR ROOT                                  |
|                                                            | <a href="#">SNP (transversion)</a> | <a href="#">nsP2</a> | <a href="#">2.659</a> |         | <a href="#">nonstructural</a> | <a href="#">2.659</a> | <a href="#">887</a>   | <a href="#">352</a> | <a href="#">1</a> | <a href="#">C -&gt; G</a> | <a href="#">SNP (transversion)</a> | <a href="#">CCT -&gt; GCT</a> | <a href="#">Substitution</a> | <a href="#">P -&gt; A</a> | <a href="#">ECSA AL NODE, ECSA RJ-SE NODE</a> |
|                                                            | SNP (transition)                   | nsP2                 | 2.667                 |         | nonstructural                 | 2.667                 | 889                   | 354                 | 3                 | C -> T                    | SNP (transition)                   | GAC -> GAT                    | None                         |                           | ECSA BR ROOT                                  |
|                                                            | SNP (transition)                   | nsP2                 | 2.778                 |         | nonstructural                 | 2.778                 | 926                   | 391                 | 3                 | C -> T                    | SNP (transition)                   | TAC -> TAT                    | None                         |                           | ECSA BR ROOT                                  |
|                                                            | <a href="#">SNP (transition)</a>   | <a href="#">nsP2</a> | <a href="#">2.889</a> |         | <a href="#">nonstructural</a> | <a href="#">2.889</a> | <a href="#">963</a>   | <a href="#">428</a> | <a href="#">3</a> | <a href="#">T -&gt; C</a> | <a href="#">SNP (transition)</a>   | <a href="#">GGT -&gt; GGC</a> | <a href="#">None</a>         |                           | <a href="#">ECSA AL NODE</a>                  |
|                                                            | SNP (transition)                   | nsP2                 | 2.946                 |         | nonstructural                 | 2.946                 | 982                   | 447                 | 3                 | T -> C                    | SNP (transition)                   | ATT -> ATC                    | None                         |                           | ECSA BR ROOT                                  |
|                                                            | SNP (transition)                   | nsP2                 | 3.033                 |         | nonstructural                 | 3.033                 | 1.011                 | 476                 | 3                 | C -> T                    | SNP (transition)                   | AAC -> AAT                    | None                         |                           | ECSA BR ROOT                                  |
|                                                            | SNP (transition)                   | nsP2                 | 3.132                 |         | nonstructural                 | 3.132                 | 1.044                 | 509                 | 3                 | C -> T                    | SNP (transition)                   | GAC -> GAT                    | None                         |                           | ECSA BR ROOT                                  |
|                                                            | SNP (transition)                   | nsP2                 | 3.193                 |         | nonstructural                 | 3.193                 | 1.065                 | 530                 | 1                 | C -> T                    | SNP (transition)                   | CTA -> TTA                    | None                         |                           | ECSA BR ROOT                                  |
|                                                            | SNP (transition)                   | nsP2                 | 3.201                 |         | nonstructural                 | 3.201                 | 1.067                 | 532                 | 3                 | C -> T                    | SNP (transition)                   | AGC -> AGT                    | None                         |                           | ECSA BR ROOT                                  |
|                                                            | SNP (transition)                   | nsP2                 | 3.219                 |         | nonstructural                 | 3.219                 | 1.073                 | 538                 | 3                 | G -> A                    | SNP (transition)                   | CCG -> CCA                    | None                         |                           | ECSA BR ROOT                                  |
|                                                            | SNP (transition)                   | nsP2                 | 3.285                 |         | nonstructural                 | 3.285                 | 1.095                 | 560                 | 3                 | T -> C                    | SNP (transition)                   | TTT -> TTC                    | None                         |                           | ECSA BR ROOT                                  |
|                                                            | SNP (transition)                   | nsP2                 | 3.369                 |         | nonstructural                 | 3.369                 | 1.123                 | 588                 | 3                 | T -> C                    | SNP (transition)                   | ACT -> ACC                    | None                         |                           | ECSA BR ROOT                                  |
|                                                            | SNP (transition)                   | nsP2                 | 3.405                 |         | nonstructural                 | 3.405                 | 1.135                 | 600                 | 3                 | C -> T                    | SNP (transition)                   | AAC -> AAT                    | None                         |                           | ECSA BR ROOT                                  |
|                                                            | SNP (transition)                   | nsP2                 | 3.420                 |         | nonstructural                 | 3.420                 | 1.140                 | 605                 | 3                 | C -> T                    | SNP (transition)                   | AAC -> AAT                    | None                         |                           | ECSA BR ROOT                                  |
|                                                            | SNP (transition)                   | nsP2                 | 3.534                 |         | nonstructural                 | 3.534                 | 1.178                 | 643                 | 3                 | C -> T                    | SNP (transition)                   | AAC -> AAT                    | None                         |                           | ECSA BR ROOT                                  |
|                                                            | <a href="#">SNP (transition)</a>   | <a href="#">nsP2</a> | <a href="#">3.539</a> |         | <a href="#">nonstructural</a> | <a href="#">3.539</a> | <a href="#">1.180</a> | <a href="#">645</a> | <a href="#">2</a> | <a href="#">C -&gt; T</a> | <a href="#">SNP (transition)</a>   | <a href="#">GCA -&gt; GTA</a> | <a href="#">Substitution</a> | <a href="#">A -&gt; V</a> | <a href="#">ECSA BR ROOT</a>                  |
|                                                            | SNP (transition)                   | nsP2                 | 3.636                 |         | nonstructural                 | 3.636                 | 1.212                 | 677                 | 3                 | T -> C                    | SNP (transition)                   | GGT -> GGC                    | None                         |                           | ECSA BR ROOT                                  |
|                                                            | SNP (transition)                   | nsP2                 | 3.825                 |         | nonstructural                 | 3.825                 | 1.275                 | 740                 | 3                 | A -> G                    | SNP (transition)                   | GTA -> GTG                    | None                         |                           | ECSA BR ROOT                                  |
|                                                            | SNP (transition)                   | nsP2                 | 3.840                 |         | nonstructural                 | 3.840                 | 1.280                 | 745                 | 3                 | T -> C                    | SNP (transition)                   | TTT -> TTC                    | None                         |                           | ECSA BR ROOT                                  |
|                                                            | SNP (transition)                   | nsP2                 | 3.951                 |         | nonstructural                 | 3.951                 | 1.317                 | 782                 | 3                 | C -> T                    | SNP (transition)                   | AAC -> AAT                    | None                         |                           | ECSA BR ROOT                                  |
| <b>Nonstructural protein nsP3 peptide</b>                  |                                    |                      | 4.000                 | 5.589   |                               |                       | 1334                  |                     |                   |                           |                                    |                               |                              |                           |                                               |
|                                                            | SNP (transition)                   | nsP3                 | 4.059                 |         | nonstructural                 | 4.059                 | 1.353                 | 20                  | 3                 | C -> T                    | SNP (transition)                   | GTC -> GTT                    | None                         |                           | ECSA BR ROOT                                  |
|                                                            | SNP (transition)                   | nsP3                 | 4.173                 |         | nonstructural                 | 4.173                 | 1.391                 | 58                  | 3                 | T -> C                    | SNP (transition)                   | GTT -> GTC                    | None                         |                           | ECSA BR ROOT                                  |
|                                                            | SNP (transition)                   | nsP3                 | 4.212                 |         | nonstructural                 | 4.212                 | 1.404                 | 71                  | 3                 | A -> G                    | SNP (transition)                   | CCA -> CCG                    | None                         |                           | ECSA BR ROOT                                  |
|                                                            | <a href="#">SNP (transition)</a>   | <a href="#">nsP3</a> | <a href="#">4.215</a> |         | <a href="#">nonstructural</a> | <a href="#">4.215</a> | <a href="#">1.405</a> | <a href="#">72</a>  | <a href="#">3</a> | <a href="#">C -&gt; T</a> | <a href="#">SNP (transition)</a>   | <a href="#">AAC -&gt; AAT</a> | <a href="#">None</a>         |                           | <a href="#">ECSA RJ-SE NODE</a>               |
|                                                            | <a href="#">SNP (transition)</a>   | <a href="#">nsP3</a> | <a href="#">4.229</a> |         | <a href="#">nonstructural</a> | <a href="#">4.229</a> | <a href="#">1.410</a> | <a href="#">77</a>  | <a href="#">2</a> | <a href="#">C -&gt; T</a> | <a href="#">SNP (transition)</a>   | <a href="#">TCG -&gt; TTG</a> | <a href="#">Substitution</a> | <a href="#">S -&gt; L</a> | <a href="#">ECSA BR ROOT</a>                  |
|                                                            | SNP (transition)                   | nsP3                 | 4.233                 |         | nonstructural                 | 4.233                 | 1.411                 | 78                  | 3                 | G -> A                    | SNP (transition)                   | GAG -> GAA                    | None                         |                           | ECSA BR ROOT                                  |
|                                                            | SNP (transition)                   | nsP3                 | 4.356                 |         | nonstructural                 | 4.356                 | 1.452                 | 119                 | 3                 | C -> T                    | SNP (transition)                   | GAC -> GAT                    | None                         |                           | ECSA BR ROOT                                  |
|                                                            | SNP (transition)                   | nsP3                 | 4.386                 |         | nonstructural                 | 4.386                 | 1.462                 | 129                 | 3                 | T -> C                    | SNP (transition)                   | TTT -> TTC                    | None                         |                           | ECSA BR ROOT                                  |
|                                                            | SNP (transition)                   | nsP3                 | 4.428                 |         | nonstructural                 | 4.428                 | 1.476                 | 143                 | 3                 | C -> T                    | SNP (transition)                   | TGC -> TGT                    | None                         |                           | ECSA BR ROOT                                  |
|                                                            | SNP (transition)                   | nsP3                 | 4.489                 |         | nonstructural                 | 4.489                 | 1.497                 | 164                 | 1                 | C -> T                    | SNP (transition)                   | CTG -> TTG                    | None                         |                           | ECSA BR ROOT                                  |
|                                                            | <a href="#">SNP (transition)</a>   | <a href="#">nsP3</a> | <a href="#">4.599</a> |         | <a href="#">nonstructural</a> | <a href="#">4.599</a> | <a href="#">1.533</a> | <a href="#">200</a> | <a href="#">3</a> | <a href="#">T -&gt; C</a> | <a href="#">SNP (transition)</a>   | <a href="#">TAT -&gt; TAC</a> | <a href="#">None</a>         |                           | <a href="#">ECSA AL NODE</a>                  |
|                                                            | SNP (transition)                   | nsP3                 | 4.611                 |         | nonstructural                 | 4.611                 | 1.537                 | 204                 | 3                 | C -> T                    | SNP (transition)                   | ACC -> ACT                    | None                         |                           | ECSA BR ROOT                                  |
|                                                            | SNP (transition)                   | nsP3                 | 4.635                 |         | nonstructural                 | 4.635                 | 1.545                 | 212                 | 3                 | T -> C                    | SNP (transition)                   | GAT -> GAC                    | None                         |                           | ECSA BR ROOT                                  |
|                                                            | SNP (transition)                   | nsP3                 | 4.641                 |         | nonstructural                 | 4.641                 | 1.547                 | 214                 | 3                 | G -> A                    | SNP (transition)                   | GCG -> GCA                    | None                         |                           | ECSA BR ROOT                                  |
|                                                            | SNP (transition)                   | nsP3                 | 4.761                 |         | nonstructural                 | 4.761                 | 1.587                 | 254                 | 3                 | A -> G                    | SNP (transition)                   | TCA -> TCG                    | None                         |                           | ECSA BR ROOT                                  |
|                                                            | SNP (transition)                   | nsP3                 | 4.767                 |         | nonstructural                 | 4.767                 | 1.589                 | 256                 | 3                 | C -> T                    | SNP (transition)                   | CCC -> CCT                    | None                         |                           | ECSA BR ROOT                                  |
|                                                            | SNP (transversion)                 | nsP3                 | 4.770                 |         | nonstructural                 | 4.770                 | 1.590                 | 257                 | 3                 | C -> A                    | SNP (transversion)                 | CCC -> CCA                    | None                         |                           | ECSA BR ROOT                                  |
|                                                            | SNP (transition)                   | nsP3                 | 4.809                 |         | nonstructural                 | 4.809                 | 1.603                 | 270                 | 3                 | A -> G                    | SNP (transition)                   | CCA -> CCG                    | None                         |                           | ECSA BR ROOT                                  |
|                                                            | SNP (transition)                   | nsP3                 | 4.848                 |         | nonstructural                 | 4.848                 | 1.616                 | 283                 | 3                 | C -> T                    | SNP (transition)                   | AGC -> AGT                    | None                         |                           | ECSA BR ROOT                                  |
|                                                            | SNP (transition)                   | nsP3                 | 4.863                 |         | nonstructural                 | 4.863                 | 1.621                 | 288                 | 3                 | T -> C                    | SNP (transition)                   | TCT -> TCC                    | None                         |                           | ECSA BR ROOT                                  |
|                                                            | <a href="#">SNP (transition)</a>   | <a href="#">nsP3</a> | <a href="#">4.950</a> |         | <a href="#">nonstructural</a> | <a href="#">4.950</a> | <a href="#">1.650</a> | <a href="#">317</a> | <a href="#">3</a> | <a href="#">G -&gt; A</a> | <a href="#">SNP (transition)</a>   | <a href="#">TCG -&gt; TCA</a> | <a href="#">None</a>         |                           | <a href="#">ECSA BR ROOT, ECSA RJ-SE NODE</a> |

|                                           |                    |           |        |        |               |       |       |     |   |        |                    |            |              |        |                 |
|-------------------------------------------|--------------------|-----------|--------|--------|---------------|-------|-------|-----|---|--------|--------------------|------------|--------------|--------|-----------------|
|                                           | SNP (transversion) | nsP3      | 4.987  |        | nonstructural | 4.987 | 1.663 | 330 | 1 | T -> G | SNP (transversion) | TCT -> GCT | Substitution | S -> A | ECSA BR ROOT    |
|                                           | SNP (transition)   | nsP3      | 5.061  |        | nonstructural | 5.061 | 1.687 | 354 | 3 | A -> G | SNP (transition)   | CTA -> CTG | None         |        | ECSA AL NODE    |
|                                           | SNP (transition)   | nsP3      | 5.109  |        | nonstructural | 5.109 | 1.703 | 370 | 3 | C -> T | SNP (transition)   | GCC -> GCT | None         |        | ECSA BR ROOT    |
|                                           | SNP (transition)   | nsP3      | 5.119  |        | nonstructural | 5.119 | 1.707 | 374 | 1 | G -> A | SNP (transition)   | GGG -> AGG | Substitution | G -> R | ECSA BR ROOT    |
|                                           | SNP (transition)   | nsP3      | 5.148  |        | nonstructural | 5.148 | 1.716 | 383 | 3 | T -> C | SNP (transition)   | ACT -> ACC | None         |        | ECSA BR ROOT    |
|                                           | SNP (transition)   | nsP3      | 5.345  |        | nonstructural | 5.345 | 1.782 | 449 | 2 | C -> T | SNP (transition)   | ACG -> ATG | Substitution | T -> M | ECSA BR ROOT    |
| <b>Nonstructural protein nsP4 peptide</b> |                    |           | 5.590  | 7.422  |               |       | 1.864 |     |   |        |                    |            |              |        |                 |
|                                           | SNP (transition)   | nsP4      | 5.707  |        | nonstructural | 5.707 | 1.903 | 40  | 1 | C -> T | SNP (transition)   | CTG -> TTG | None         |        | ECSA BR ROOT    |
|                                           | SNP (transition)   | nsP4      | 5.717  |        | nonstructural | 5.717 | 1.906 | 43  | 2 | C -> T | SNP (transition)   | GCA -> GTA | Substitution | A -> V | ECSA BR ROOT    |
|                                           | SNP (transition)   | nsP4      | 5.866  |        | nonstructural | 5.866 | 1.956 | 93  | 1 | C -> T | SNP (transition)   | CCA -> TCA | Substitution | P -> S | ECSA BR ROOT    |
|                                           | SNP (transition)   | nsP4      | 5.920  |        | nonstructural | 5.920 | 1.974 | 111 | 1 | A -> G | SNP (transition)   | ATC -> GTC | Substitution | I -> V | ECSA RJ NODE    |
|                                           | SNP (transition)   | nsP4      | 6.034  |        | nonstructural | 6.034 | 2.012 | 149 | 1 | C -> T | SNP (transition)   | CTA -> TTA | None         |        | ECSA BR ROOT    |
|                                           | SNP (transition)   | nsP4      | 6.126  |        | nonstructural | 6.126 | 2.042 | 179 | 3 | C -> T | SNP (transition)   | CAC -> CAT | None         |        | ECSA BR ROOT    |
|                                           | SNP (transition)   | nsP4      | 6.273  |        | nonstructural | 6.273 | 2.091 | 228 | 3 | C -> T | SNP (transition)   | TTC -> TTT | None         |        | ECSA BR ROOT    |
|                                           | SNP (transition)   | nsP4      | 6.396  |        | nonstructural | 6.396 | 2.132 | 269 | 3 | C -> T | SNP (transition)   | TTC -> TTT | None         |        | ECSA BR ROOT    |
|                                           | SNP (transition)   | nsP4      | 6.408  |        | nonstructural | 6.408 | 2.136 | 273 | 3 | T -> C | SNP (transition)   | CAT -> CAC | None         |        | ECSA BR ROOT    |
|                                           | SNP (transition)   | nsP4      | 6.630  |        | nonstructural | 6.630 | 2.210 | 347 | 3 | C -> T | SNP (transition)   | GAC -> GAT | None         |        | ECSA BR ROOT    |
|                                           | SNP (transition)   | nsP4      | 6.717  |        | nonstructural | 6.717 | 2.239 | 376 | 3 | T -> C | SNP (transition)   | GAT -> GAC | None         |        | ECSA BR ROOT    |
|                                           | SNP (transition)   | nsP4      | 6.750  |        | nonstructural | 6.750 | 2.250 | 387 | 3 | T -> C | SNP (transition)   | GCT -> GCC | None         |        | ECSA BR ROOT    |
|                                           | SNP (transition)   | nsP4      | 6.757  |        | nonstructural | 6.757 | 2.253 | 390 | 1 | C -> T | SNP (transition)   | CTG -> TTG | None         |        | ECSA BR ROOT    |
|                                           | SNP (transition)   | nsP4      | 6.813  |        | nonstructural | 6.813 | 2.271 | 408 | 3 | C -> T | SNP (transition)   | TTC -> TTT | None         |        | ECSA BR ROOT    |
|                                           | SNP (transversion) | nsP4      | 6.936  |        | nonstructural | 6.936 | 2.312 | 449 | 3 | A -> C | SNP (transversion) | CGA -> CGC | None         |        | ECSA BR ROOT    |
|                                           | SNP (transversion) | nsP4      | 7.031  |        | nonstructural | 7.031 | 2.344 | 481 | 2 | C -> A | SNP (transversion) | GCC -> GAC | Substitution | A -> D | ECSA RJ-SE NODE |
|                                           | SNP (transition)   | C protein | 7.146  |        | nonstructural | 7.146 | 2.382 | 519 | 3 | T -> C | SNP (transition)   | GCT -> GCC | None         |        | ECSA BR ROOT    |
| <b>C protein peptide</b>                  |                    |           | 7.491  | 8.273  |               | 1     | 1     | 1   |   |        |                    |            |              |        |                 |
|                                           | SNP (transversion) | C protein | 7.498  |        | structural    | 7     | 3     | 3   | 2 | T -> A | SNP (transversion) | TTC -> TAC | Substitution | F -> Y | ECSA BR ROOT    |
|                                           | SNP (transition)   | C protein | 7.559  |        | structural    | 69    | 23    | 23  | 3 | T -> C | SNP (transition)   | CCT -> CCC | None         |        | ECSA BR ROOT    |
|                                           | SNP (transversion) | C protein | 7.571  |        | structural    | 81    | 27    | 27  | 3 | C -> A | SNP (transversion) | GTC -> GTA | None         |        | ECSA BR ROOT    |
|                                           | SNP (transition)   | C protein | 7.604  |        | structural    | 114   | 38    | 38  | 3 | T -> C | SNP (transition)   | GCT -> GCC | None         |        | ECSA BR ROOT    |
|                                           | SNP (transition)   | C protein | 7.711  |        | structural    | 221   | 74    | 74  | 2 | A -> G | SNP (transition)   | CAA -> CGA | Substitution | Q -> R | ECSA BR ROOT    |
|                                           | SNP (transition)   | C protein | 7.835  |        | structural    | 345   | 115   | 115 | 3 | C -> T | SNP (transition)   | TTC -> TTT | None         |        | ECSA BR ROOT    |
|                                           | SNP (transition)   | C protein | 7.845  |        | structural    | 355   | 119   | 119 | 1 | C -> T | SNP (transition)   | CAT -> TAT | Substitution | H -> Y | ECSA BR ROOT    |
|                                           | SNP (transition)   | C protein | 8.039  |        | structural    | 549   | 183   | 183 | 3 | G -> A | SNP (transition)   | CCG -> CCA | None         |        | ECSA BR ROOT    |
| <b>E3 protein peptide</b>                 |                    |           | 8.274  | 8.465  |               |       | 262   |     |   |        |                    |            |              |        |                 |
|                                           | SNP (transition)   | E3        | 8.301  |        | structural    | 811   | 271   | 10  | 1 | T -> C | SNP (transition)   | TTG -> CTG | None         |        | ECSA BR ROOT    |
|                                           | SNP (transition)   | E3        | 8.309  |        | structural    | 819   | 273   | 12  | 3 | C -> T | SNP (transition)   | AAC -> AAT | None         |        | ECSA BR ROOT    |
|                                           | SNP (transversion) | E3        | 8.342  |        | structural    | 852   | 284   | 23  | 3 | A -> T | SNP (transversion) | ACA -> ACT | None         |        | ECSA BR ROOT    |
|                                           | SNP (transition)   | E3        | 8.354  |        | structural    | 864   | 288   | 27  | 3 | C -> T | SNP (transition)   | TAC -> TAT | None         |        | ECSA BR ROOT    |
|                                           | SNP (transition)   | E3        | 8.359  |        | structural    | 869   | 290   | 29  | 2 | A -> G | SNP (transition)   | AAG -> AGG | Substitution | K -> R | ECSA BR ROOT    |
|                                           | SNP (transition)   | E3        | 8.456  |        | structural    | 966   | 322   | 61  | 3 | C -> T | SNP (transition)   | CGC -> CGT | None         |        | ECSA BR ROOT    |
| <b>E2 protein peptide</b>                 |                    |           | 8.466  | 9.734  |               |       | 326   |     |   |        |                    |            |              |        |                 |
|                                           | SNP (transition)   | E2        | 8.507  |        | structural    | 1.017 | 339   | 14  | 3 | A -> G | SNP (transition)   | CCA -> CCG | None         |        | ECSA BR ROOT    |
|                                           | SNP (transition)   | E2        | 8.565  |        | structural    | 1.075 | 359   | 34  | 1 | C -> T | SNP (transition)   | CTA -> TTA | None         |        | ECSA BR ROOT    |
|                                           | SNP (transition)   | E2        | 8.686  |        | structural    | 1.196 | 399   | 74  | 2 | T -> C | SNP (transition)   | ATG -> ACG | Substitution | M -> T | ECSA BR ROOT    |
|                                           | SNP (transition)   | E2        | 8.693  |        | structural    | 1.203 | 401   | 76  | 3 | A -> G | SNP (transition)   | GCA -> GCG | None         |        | ECSA BR ROOT    |
|                                           | SNP (transition)   | E2        | 8.772  |        | structural    | 1.282 | 428   | 103 | 1 | G -> A | SNP (transition)   | GCC -> ACC | Substitution | A -> T | ECSA BR ROOT    |
|                                           | SNP (transition)   | E2        | 8.858  |        | structural    | 1.368 | 456   | 131 | 3 | C -> T | SNP (transition)   | CAC -> CAT | None         |        | ECSA AL NODE    |
|                                           | SNP (transition)   | E2        | 8.882  |        | structural    | 1.392 | 464   | 139 | 3 | A -> G | SNP (transition)   | GAA -> GAG | None         |        | ECSA BR ROOT    |
|                                           | SNP (transition)   | E2        | 8.918  |        | structural    | 1.428 | 476   | 151 | 3 | A -> G | SNP (transition)   | CTA -> CTG | None         |        | ECSA BR ROOT    |
|                                           | SNP (transition)   | E2        | 9.041  |        | structural    | 1.551 | 517   | 192 | 3 | T -> C | SNP (transition)   | GTT -> GTC | None         |        | ECSA AL NODE    |
|                                           | SNP (transition)   | E2        | 9.128  |        | structural    | 1.638 | 546   | 221 | 3 | G -> A | SNP (transition)   | AAG -> AAA | None         |        | ECSA BR ROOT    |
|                                           | SNP (transition)   | E2        | 9.176  |        | structural    | 1.686 | 562   | 237 | 3 | T -> C | SNP (transition)   | TAT -> TAC | None         |        | ECSA BR ROOT    |
|                                           | SNP (transition)   | E2        | 9.230  |        | structural    | 1.740 | 580   | 255 | 3 | T -> C | SNP (transition)   | ATT -> ATC | None         |        | ECSA BR ROOT    |
|                                           | SNP (transition)   | E2        | 9.332  |        | structural    | 1.842 | 614   | 289 | 3 | T -> C | SNP (transition)   | CCT -> CCC | None         |        | ECSA BR ROOT    |
|                                           | SNP (transition)   | E2        | 9.362  |        | structural    | 1.872 | 624   | 299 | 3 | T -> C | SNP (transition)   | AAT -> AAC | None         |        | ECSA BR ROOT    |
|                                           | SNP (transition)   | E2        | 9.383  |        | structural    | 1.893 | 631   | 306 | 3 | T -> C | SNP (transition)   | TAT -> TAC | None         |        | ECSA BR ROOT    |
|                                           | SNP (transition)   | E2        | 9.458  |        | structural    | 1.968 | 656   | 331 | 3 | C -> T | SNP (transition)   | GGC -> GGT | None         |        | ECSA BR ROOT    |
| <b>6K protein peptide</b>                 |                    |           | 9.735  | 9.917  |               |       | 749   |     |   |        |                    |            |              |        |                 |
|                                           | SNP (transition)   | 6k        | 9.770  |        | structural    | 2.280 | 760   | 12  | 3 | C -> T | SNP (transition)   | AAC -> AAT | None         |        | ECSA BR ROOT    |
|                                           | SNP (transition)   | 6k        | 9.773  |        | structural    | 2.283 | 761   | 13  | 3 | G -> A | SNP (transition)   | GAG -> GAA | None         |        | ECSA RJ NODE    |
|                                           | SNP (transition)   | 6k        | 9.860  |        | structural    | 2.370 | 790   | 42  | 3 | T -> C | SNP (transition)   | TGT -> TGC | None         |        | ECSA BR ROOT    |
| <b>E1 protein peptide</b>                 |                    |           | 9.918  | 11.234 |               |       | 810   |     |   |        |                    |            |              |        |                 |
|                                           | SNP (transition)   | E1        | 10.079 |        | structural    | 2.589 | 863   | 54  | 3 | C -> T | SNP (transition)   | GTC -> GTT | None         |        | ECSA BR ROOT    |

|                    |    |        |            |       |       |     |   |        |                    |            |              |        |                 |
|--------------------|----|--------|------------|-------|-------|-----|---|--------|--------------------|------------|--------------|--------|-----------------|
| SNP (transversion) | E1 | 10.190 | structural | 2.700 | 900   | 91  | 3 | C -> A | SNP (transversion) | GGC -> GGA | None         |        | ECSA BR ROOT    |
| SNP (transition)   | E1 | 10.238 | structural | 2.748 | 916   | 107 | 3 | T -> C | SNP (transition)   | CAT -> CAC | None         |        | ECSA BR ROOT    |
| SNP (transversion) | E1 | 10.361 | structural | 2.871 | 957   | 148 | 3 | A -> T | SNP (transversion) | GCA -> GCT | None         |        | ECSA BR ROOT    |
| SNP (transversion) | E1 | 10.549 | structural | 3.059 | 1.020 | 211 | 2 | A -> C | SNP (transversion) | AAA -> ACA | Substitution | K -> T | ECSA RJ-SE NODE |
| SNP (transition)   | E1 | 10.727 | structural | 3.237 | 1.079 | 270 | 3 | C -> T | SNP (transition)   | AAC -> AAT | None         |        | ECSA BR ROOT    |
| SNP (transition)   | E1 | 10.780 | structural | 3.290 | 1.097 | 288 | 2 | C -> T | SNP (transition)   | ACT -> ATT | Substitution | T -> I | ECSA BR ROOT    |
| SNP (transversion) | E1 | 10.931 | structural | 3.441 | 1.147 | 338 | 3 | T -> A | SNP (transversion) | ACT -> ACA | None         |        | ECSA BR ROOT    |
| SNP (transition)   | E1 | 10.997 | structural | 3.507 | 1.169 | 360 | 3 | A -> G | SNP (transition)   | TTA -> TTG | None         |        | ECSA BR ROOT    |
| SNP (transition)   | E1 | 11.047 | structural | 3.557 | 1.186 | 377 | 2 | C -> T | SNP (transition)   | GCA -> GTA | Substitution | A -> V | ECSA BR ROOT    |
| SNP (transversion) | E1 | 11.136 | structural | 3.646 | 1.216 | 407 | 1 | A -> C | SNP (transversion) | ATG -> CTG | Substitution | M -> L | ECSA BR ROOT    |
| SNP (transition)   | E1 | 11.165 | structural | 3.675 | 1.225 | 416 | 3 | T -> C | SNP (transition)   | GGT -> GGC | None         |        | ECSA BR ROOT    |
| SNP (transition)   | E1 | 11.225 | structural | 3.735 | 1.245 | 436 | 3 | T -> C | SNP (transition)   | TTT -> TTC | None         |        | ECSA BR ROOT    |
